# Supplementary material for: Synthesis, conformational studies, and biological properties of phosphonomethoxyethyl derivatives of nucleobases with a locked conformation via a pyrrolidine ring
Source: Royal Society of Chemistry journal article supplement (doi:10.1039/c5ob00097a), 2015-01-01

Supporting Information

**SYNTHESIS, CONFORMATIONAL STUDY, AND BIOLOGICAL PROPERTIES OF  
PHOSPHONOMETHOXY DERIVATIVES OF NUCLEOBASES WITH LOCKED  
CONFORMATION VIA PYRROLIDINE RING**

Radek Pohl<sup>1</sup>, Soňa Kovačková<sup>1</sup>, Lenka Poštová Slavětínská<sup>1</sup>, Wai Soon Eng<sup>2</sup>, Dianne T. Keough<sup>2</sup>,  
Luke W. Guddat<sup>2</sup>, Dominik Rejman<sup>1\*</sup>

<sup>1</sup>*Institute of Organic Chemistry and Biochemistry, Academy of Sciences of the Czech Republic, Flemingovo  
nám. 2, 166 10 Prague 6, Czech Republic* <sup>2</sup>*The School of Chemistry and Molecular Biosciences, The  
University of Queensland, Brisbane, 4072 QLD, Australia*

<sup>1</sup>H NMR spectra of **15a** measured in D<sub>2</sub>O at various pD values:

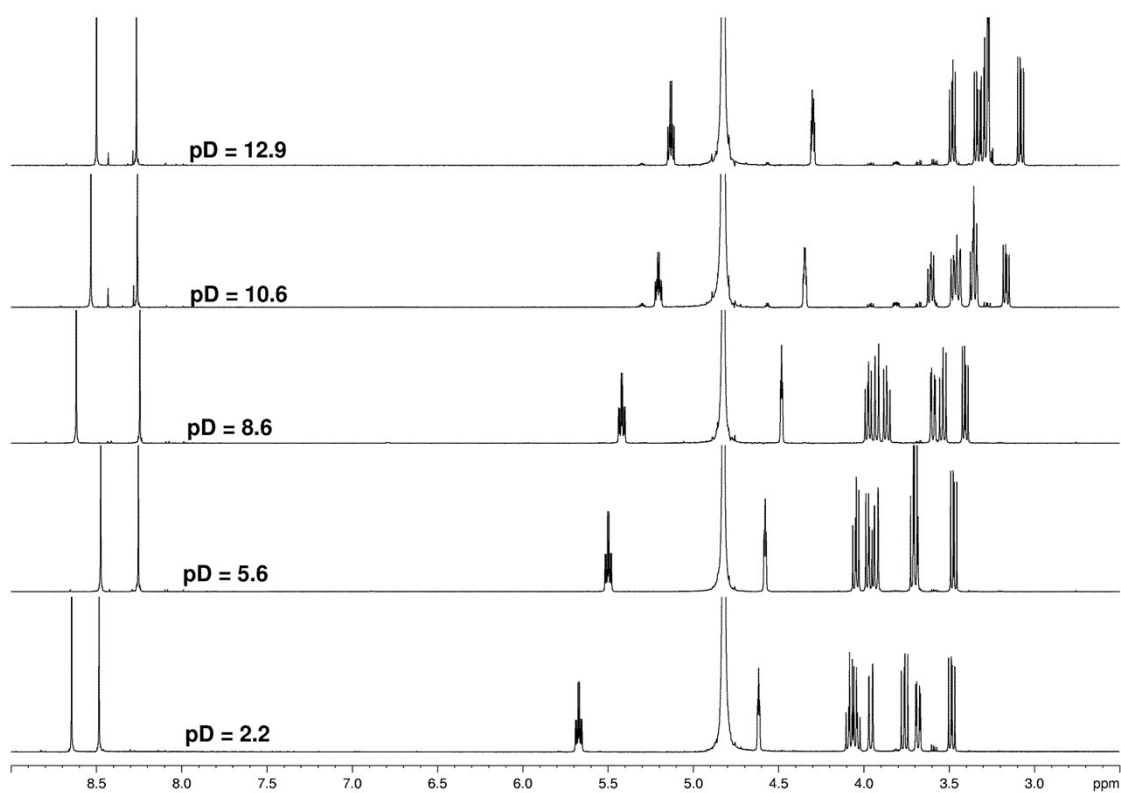

$^{13}\text{C}$  NMR spectra of **15a** measured in  $\text{D}_2\text{O}$  at various pD values:

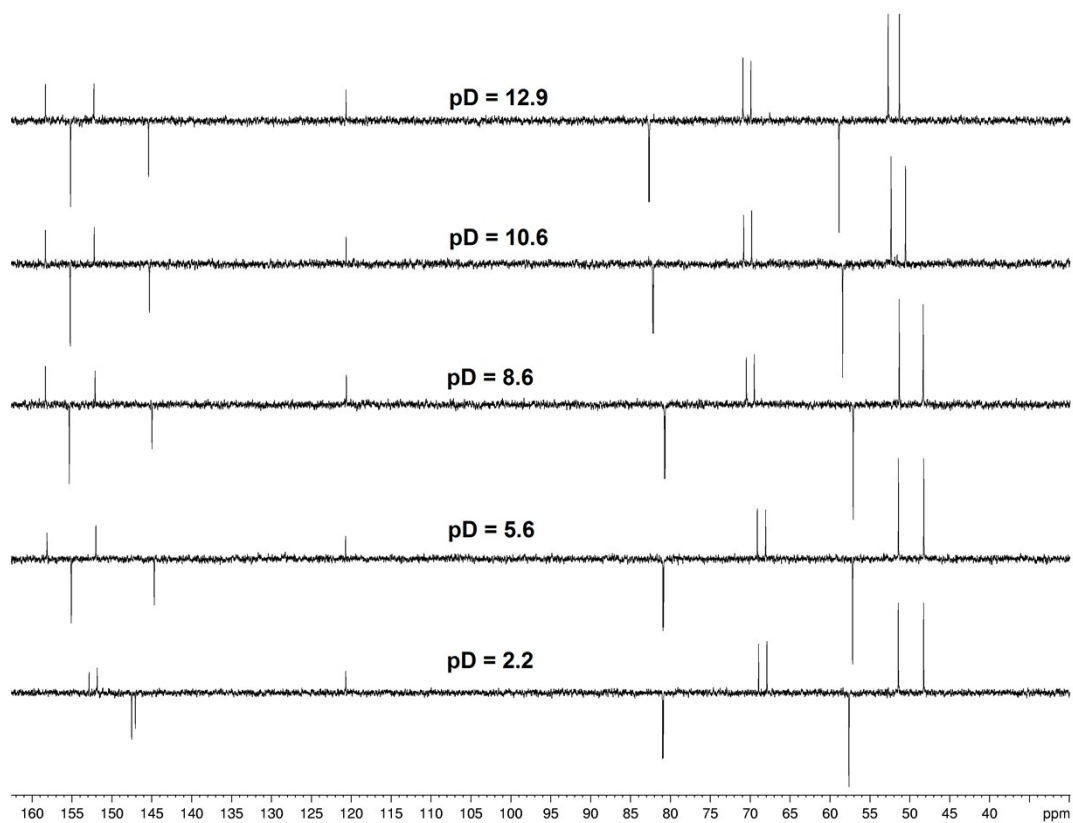

$^{31}\text{P}$  NMR spectra of **15a** measured in  $\text{D}_2\text{O}$  at various pD values:

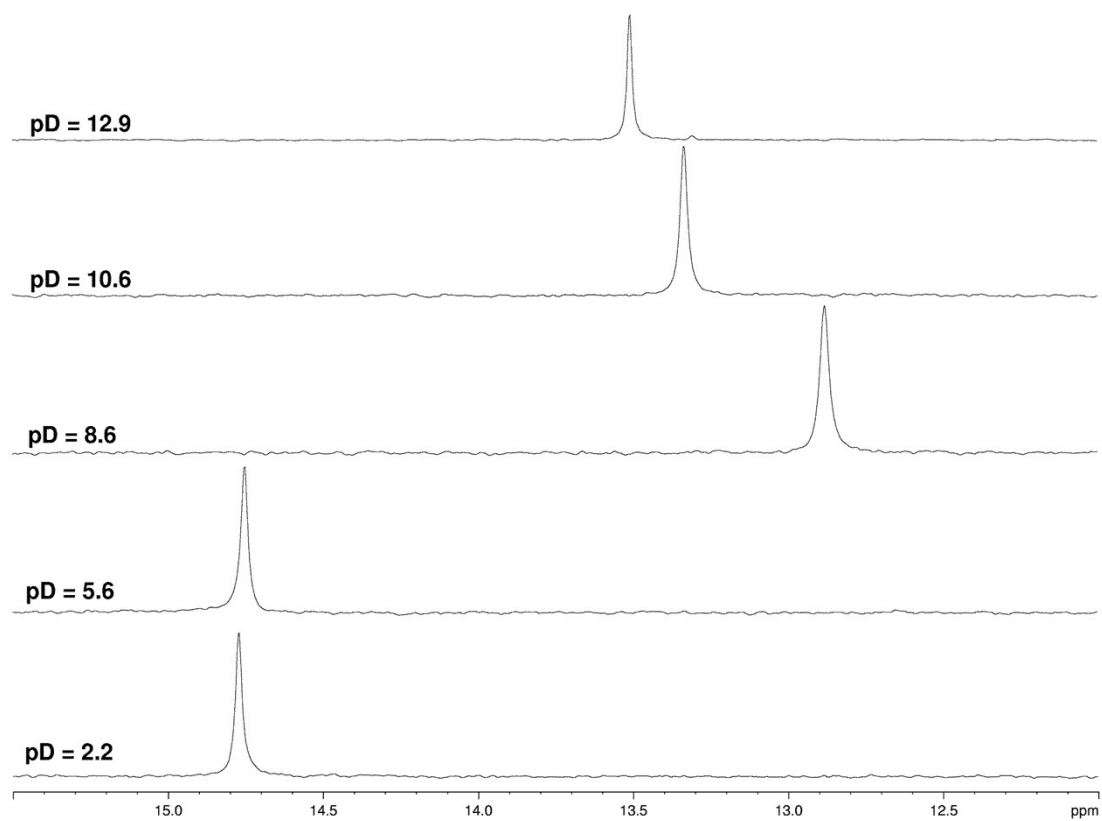

pD dependence of  $^1\text{H}$  chemical shifts of pyrrolidine, phosphonate and adenine protons of **15a**:

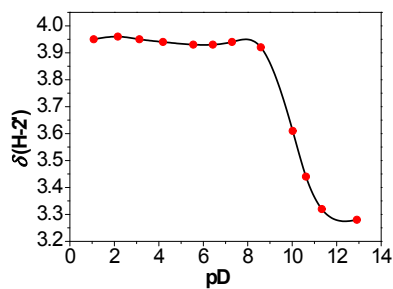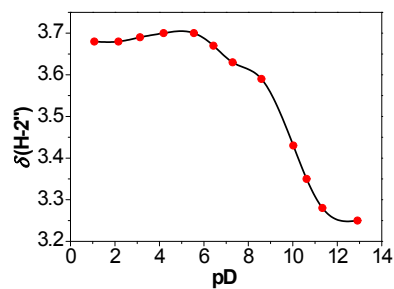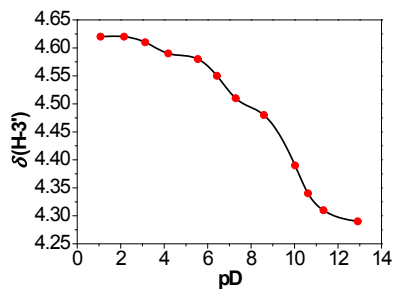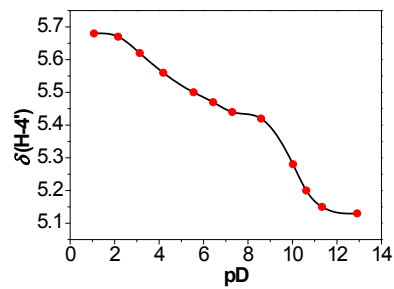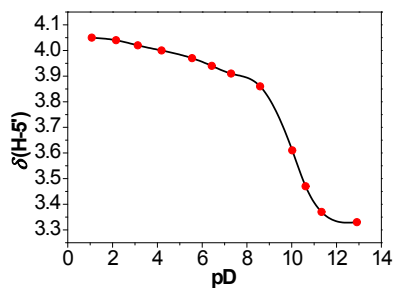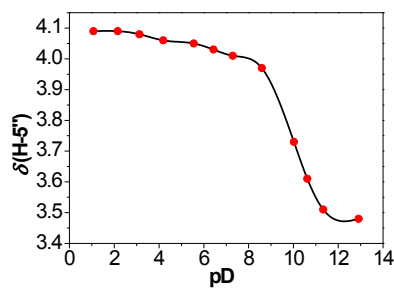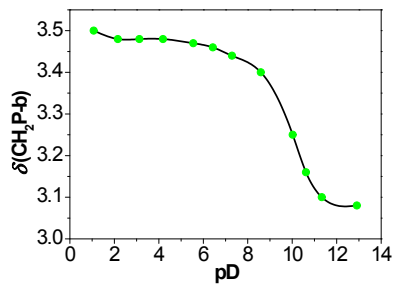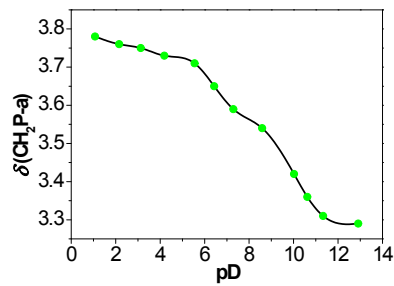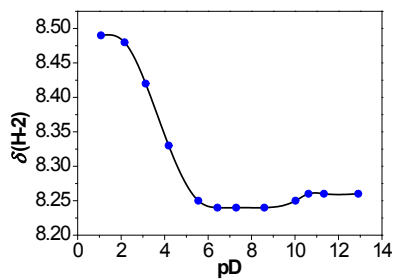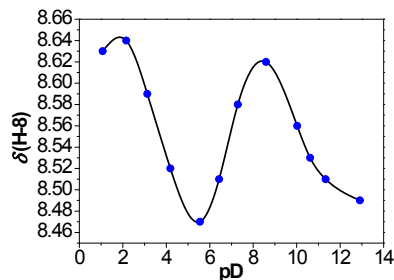

pD dependence of  $^{13}\text{C}$  chemical shifts of pyrrolidine, phosphonate and adenine<sup>a</sup> carbons of **15a**:

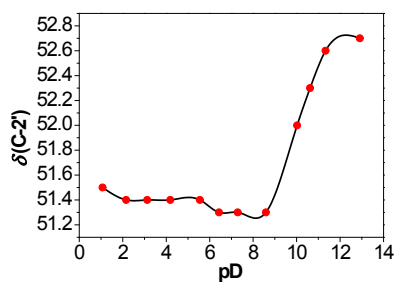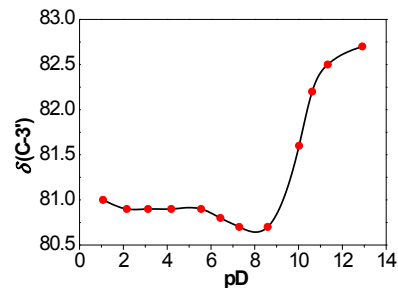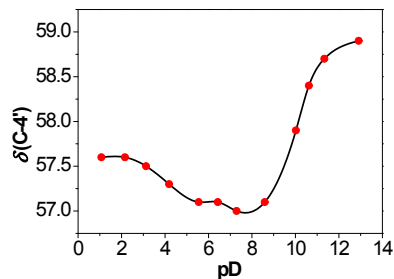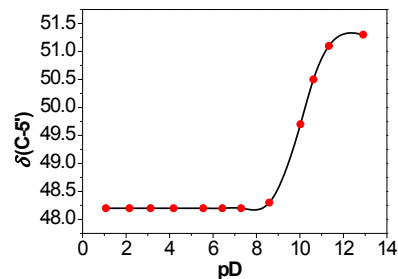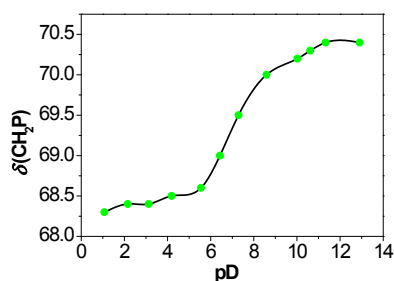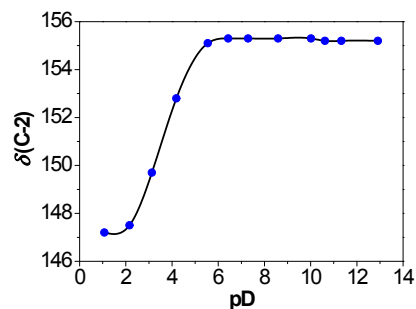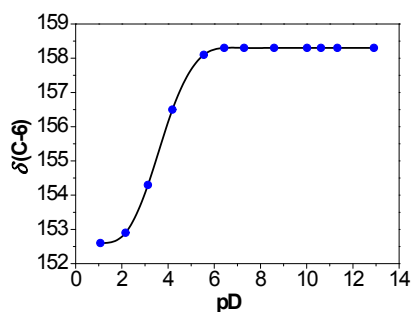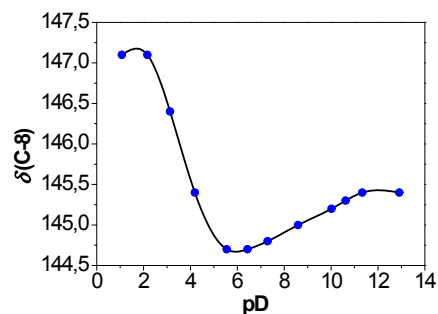

<sup>13</sup>C-4 and C-5 are not shown due to their negligible changes in their chemical shifts

pD dependence of  $^{31}\text{P}$  chemical shift of **15a**:

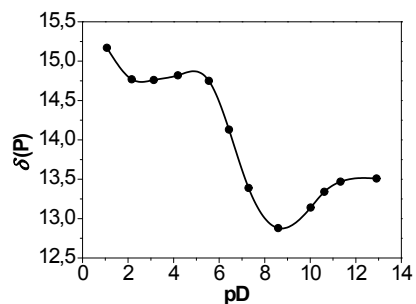

Copies of  $^1\text{H}$ ,  $^{13}\text{C}$  and  $^{31}\text{P}$  NMR spectra of **15a-e** and **16a-c**

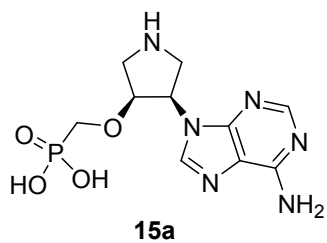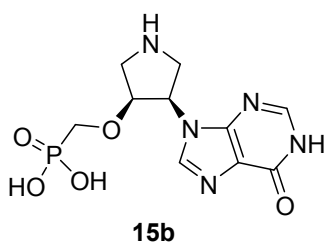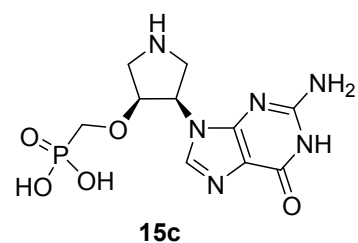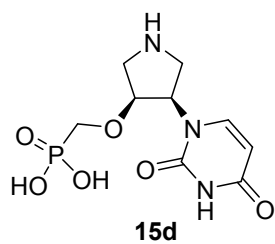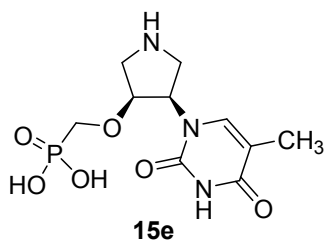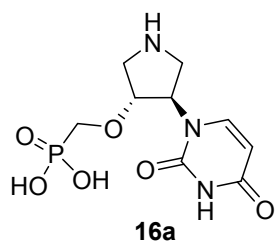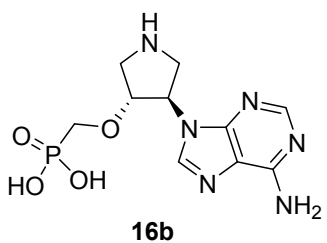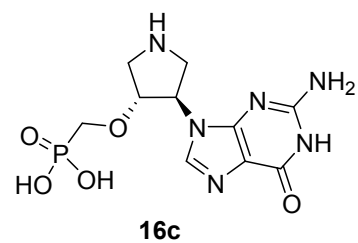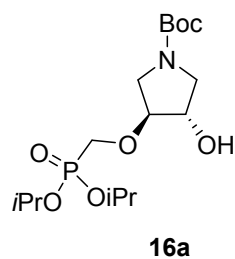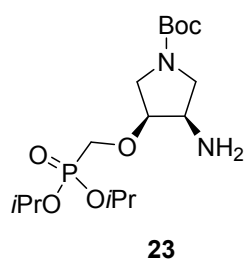

$^1\text{H}$  NMR of **15a** (499.8 MHz,  $\text{D}_2\text{O}$ )

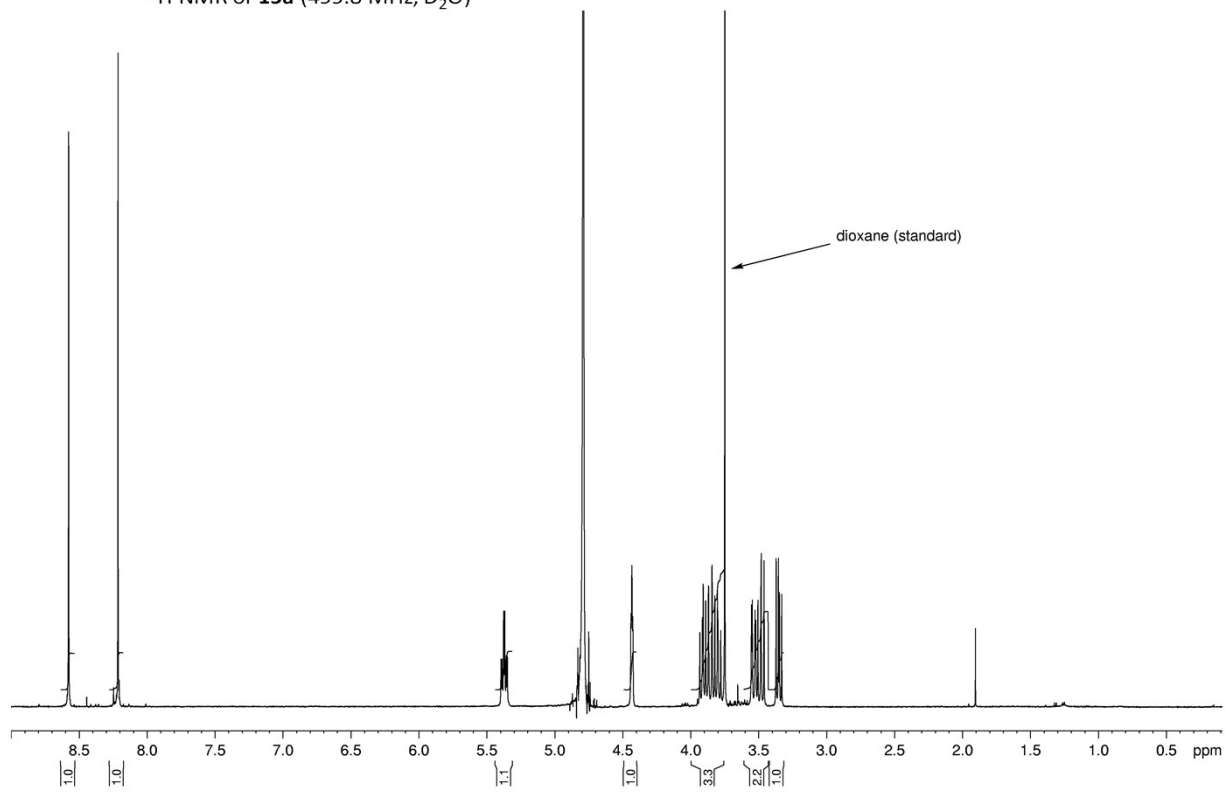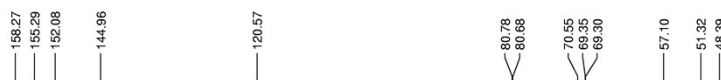

$^{13}\text{C}$  NMR of **15a** (125.7 MHz,  $\text{D}_2\text{O}$ )

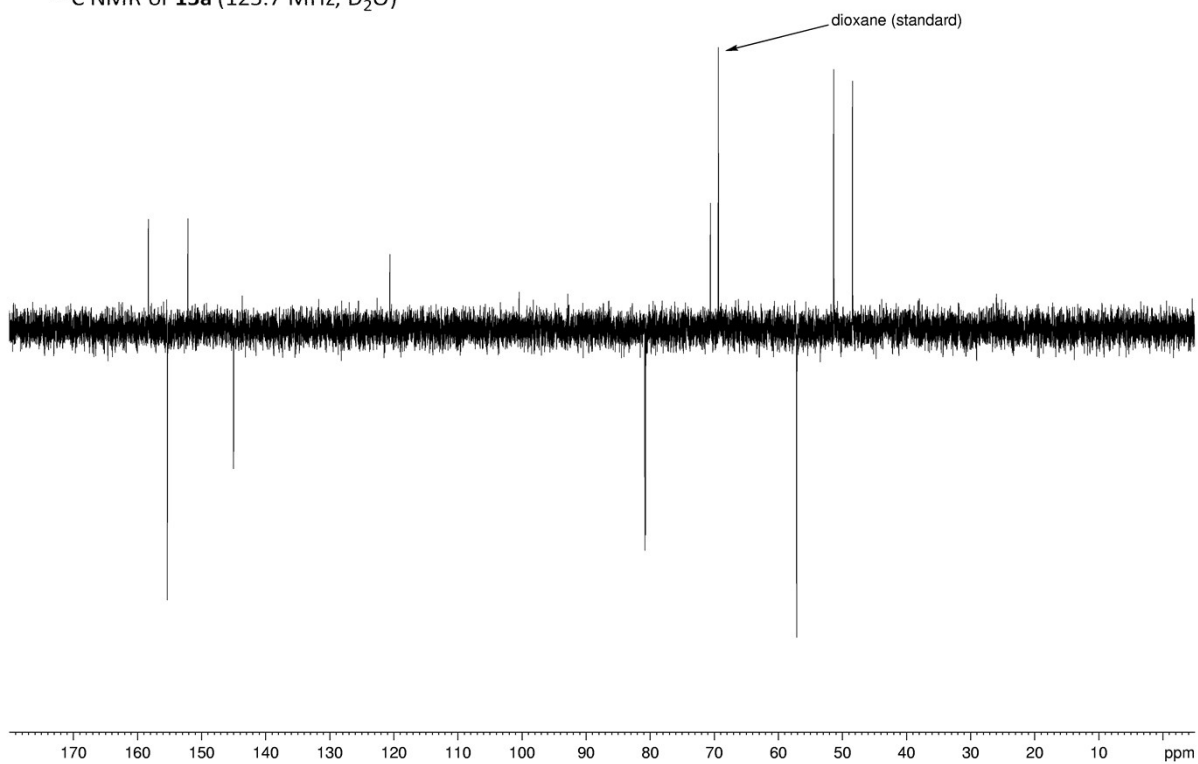

$^{31}\text{P}\{^1\text{H}\}$  NMR of **15a** (202.3 MHz,  $\text{D}_2\text{O}$ )

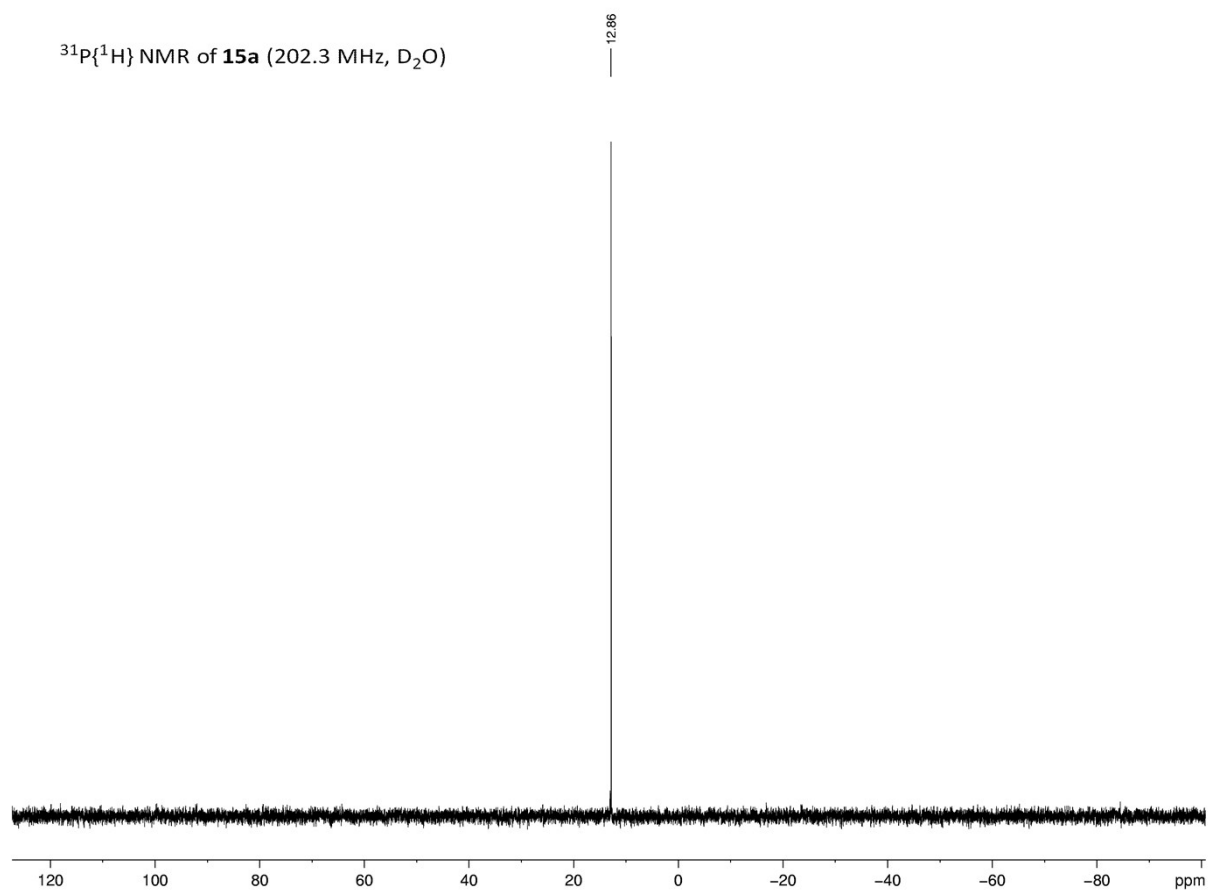

$^1\text{H}$  NMR of **15b** (600.1 MHz,  $\text{D}_2\text{O}$ )

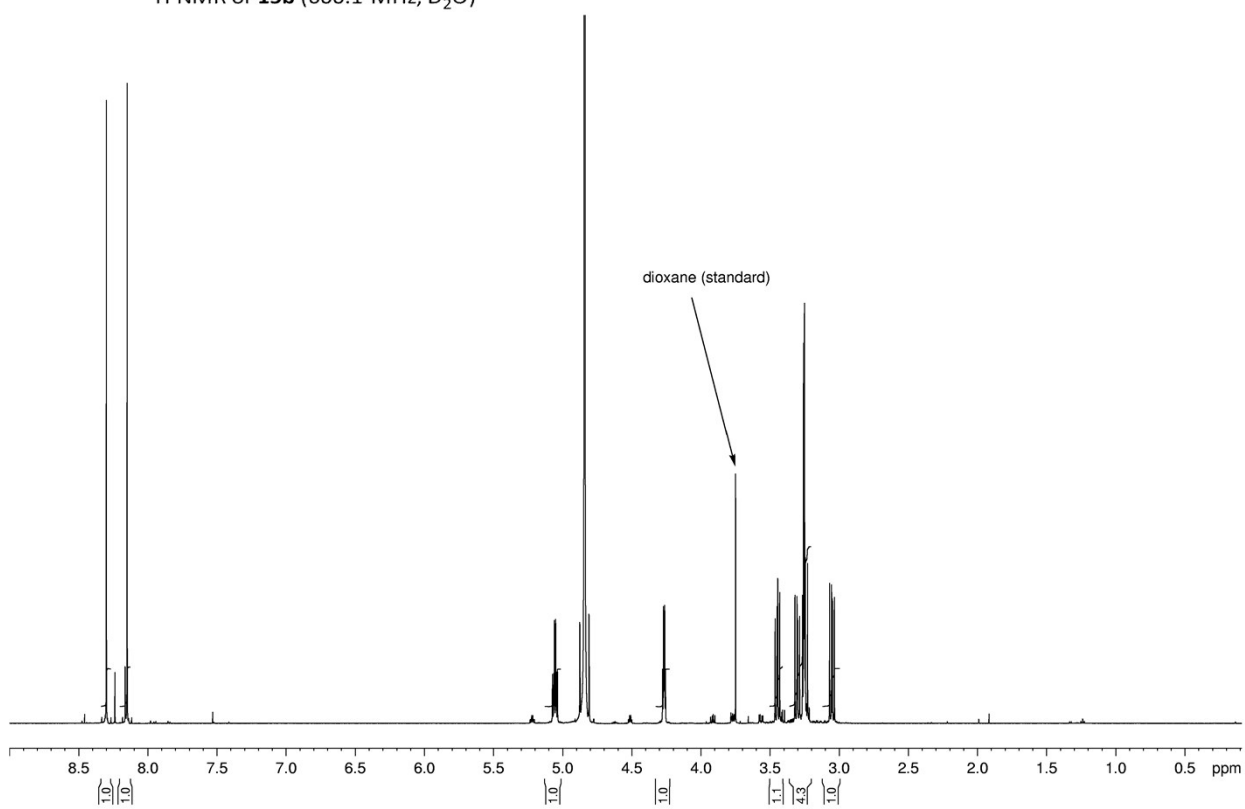

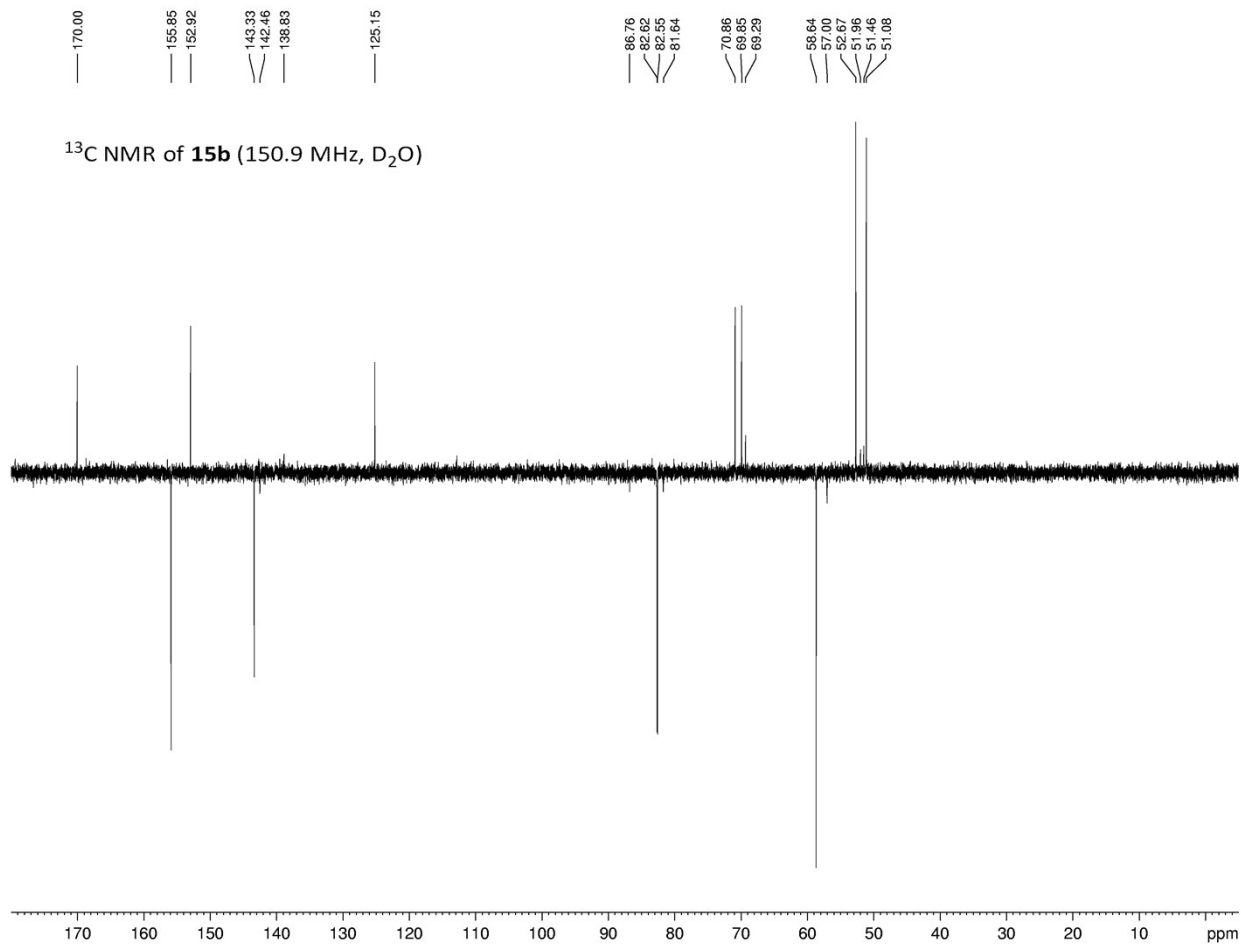





165.61  
159.82  
154.55  
141.98  
118.59  
82.06  
81.98  
70.85  
69.65  
57.95  
52.25  
50.47

$^{13}\text{C}$  NMR of **15c** (125.7 MHz,  $\text{D}_2\text{O}$ )

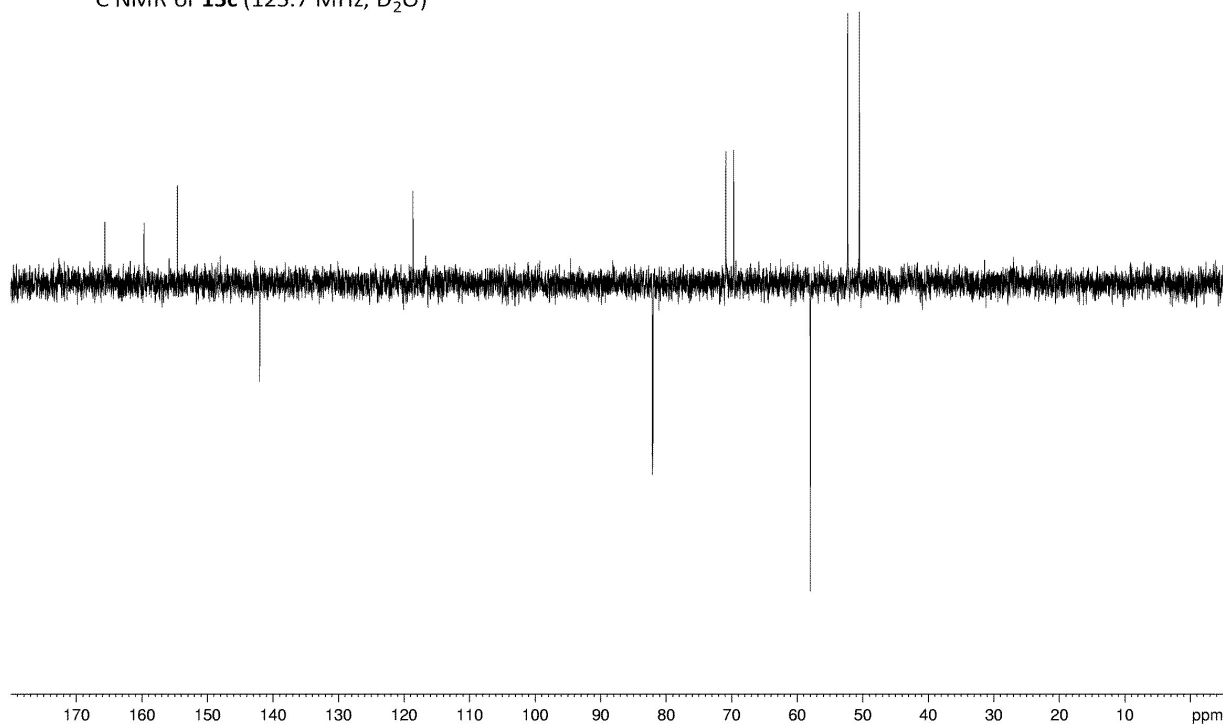

$^{31}\text{P}\{^1\text{H}\}$  NMR of **15c** (202.3 MHz,  $\text{D}_2\text{O}$ )

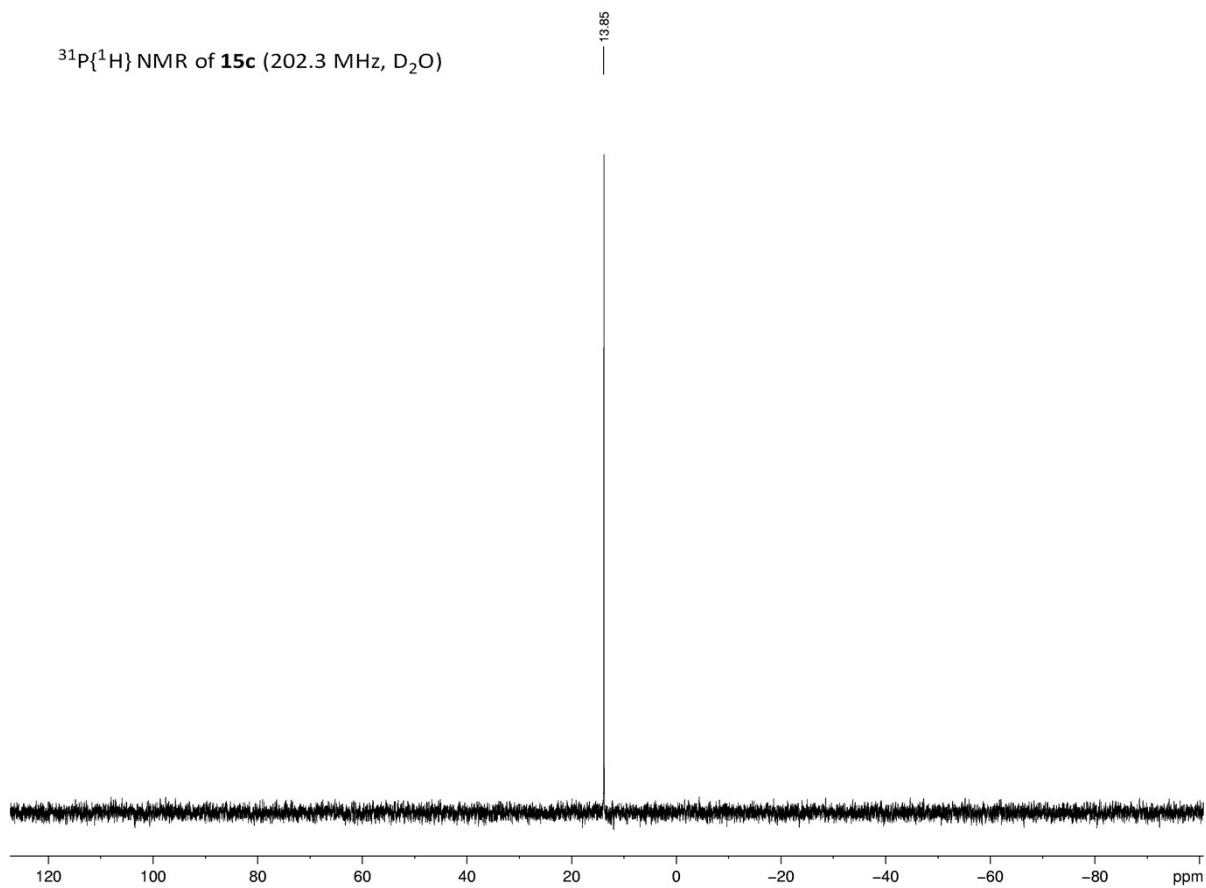

$^1\text{H}$  NMR of **15d** (500.0 MHz,  $\text{D}_2\text{O}$ )

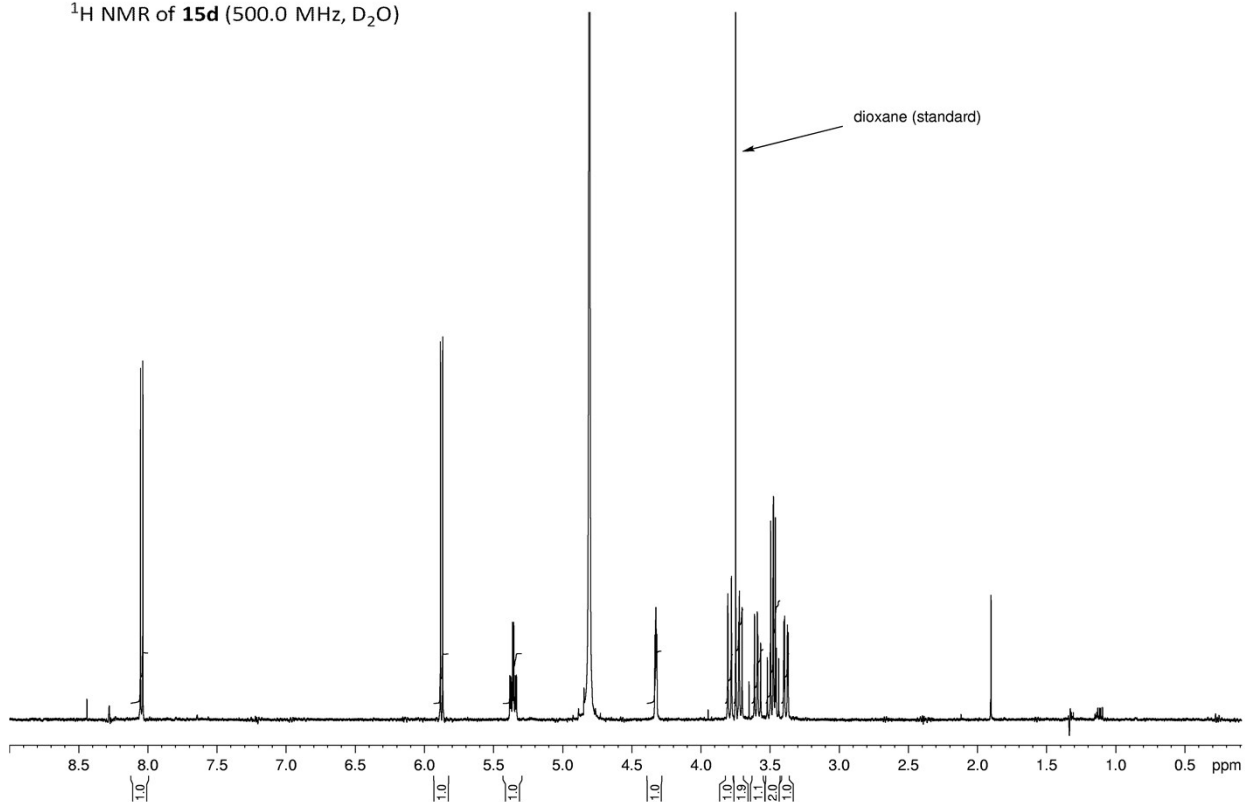

169.22    155.48    148.21    104.30    80.82    80.52    70.43    69.30    69.23    57.26    51.46    46.54

$^{13}\text{C}$  NMR of **15d** (125.7 MHz,  $\text{D}_2\text{O}$ )

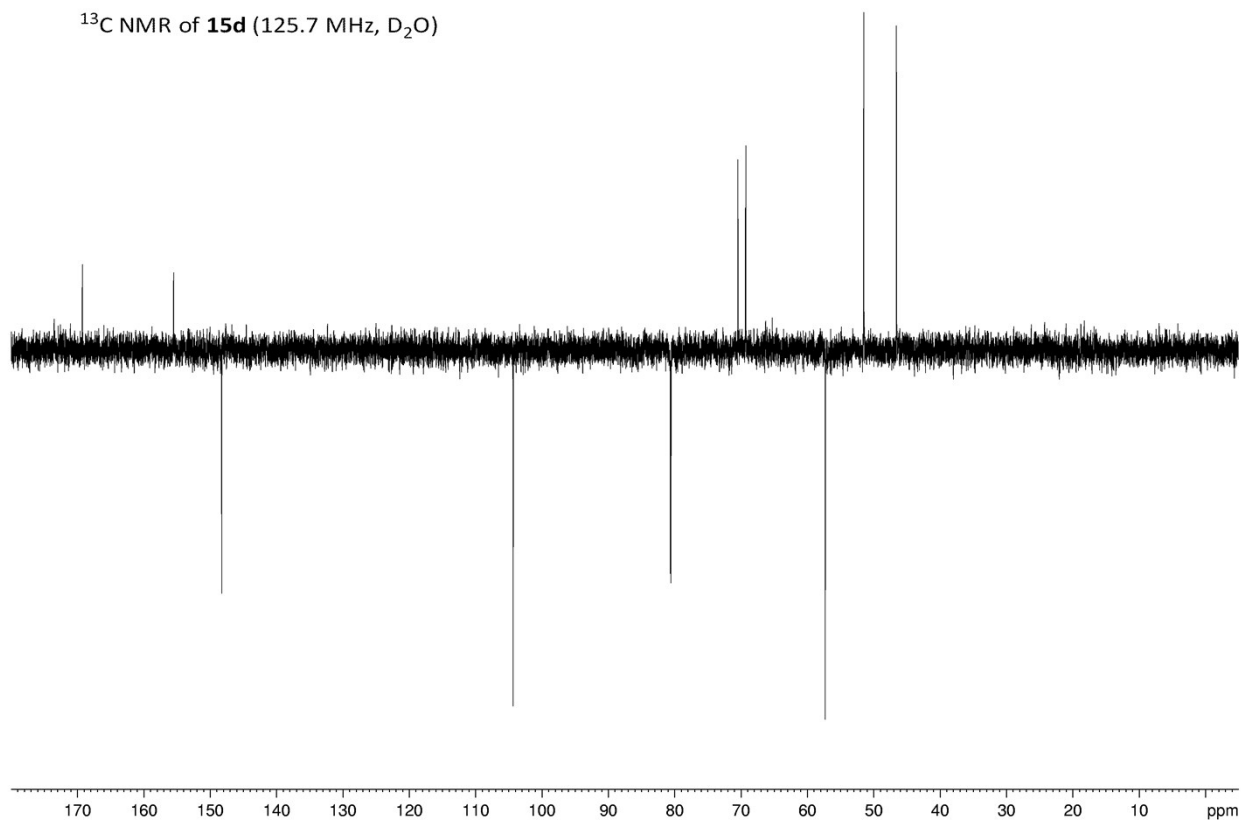

$^{31}\text{P}\{^1\text{H}\}$  NMR of **15d** (202.3 MHz,  $\text{D}_2\text{O}$ )

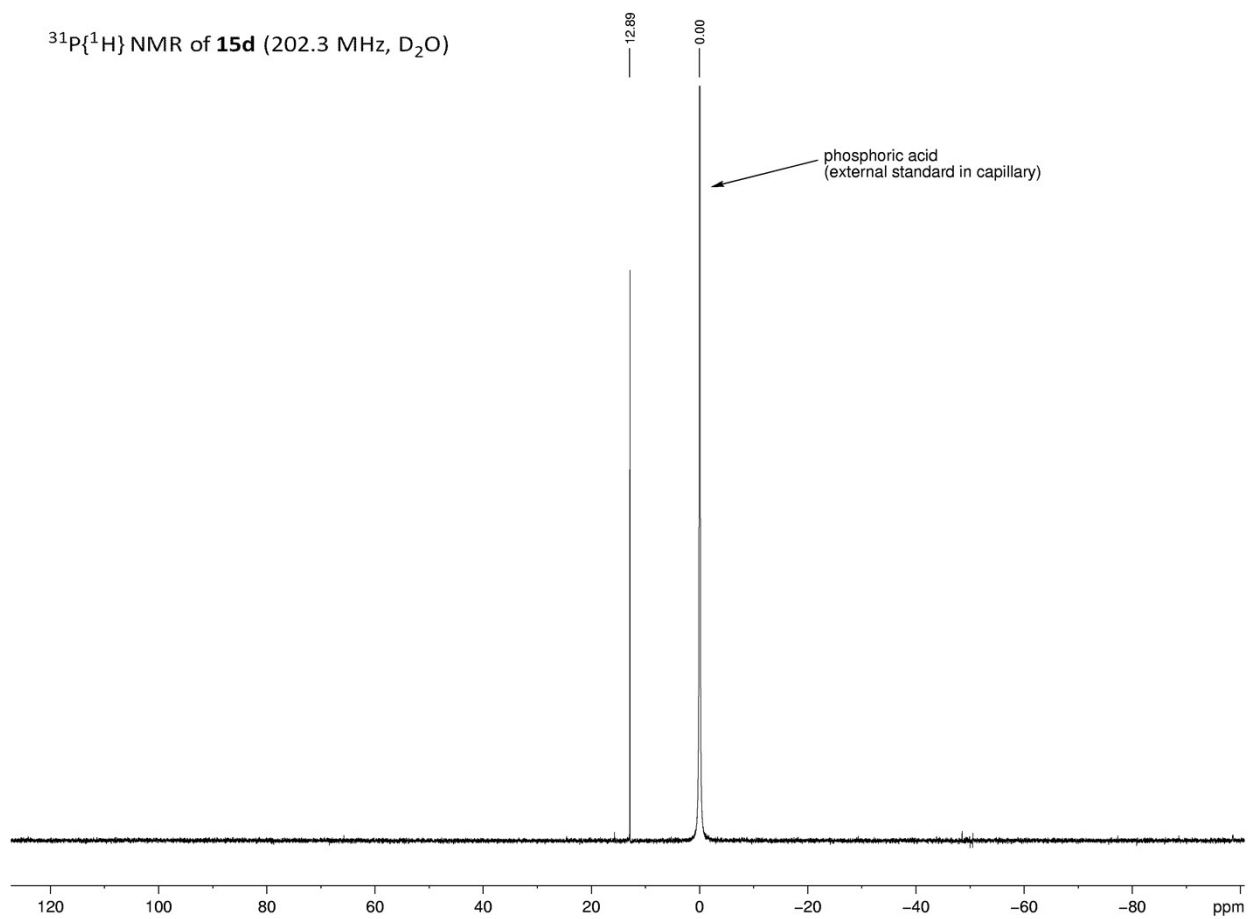

$^1\text{H}$  NMR of **15e** (500.0 MHz,  $\text{D}_2\text{O}$ )

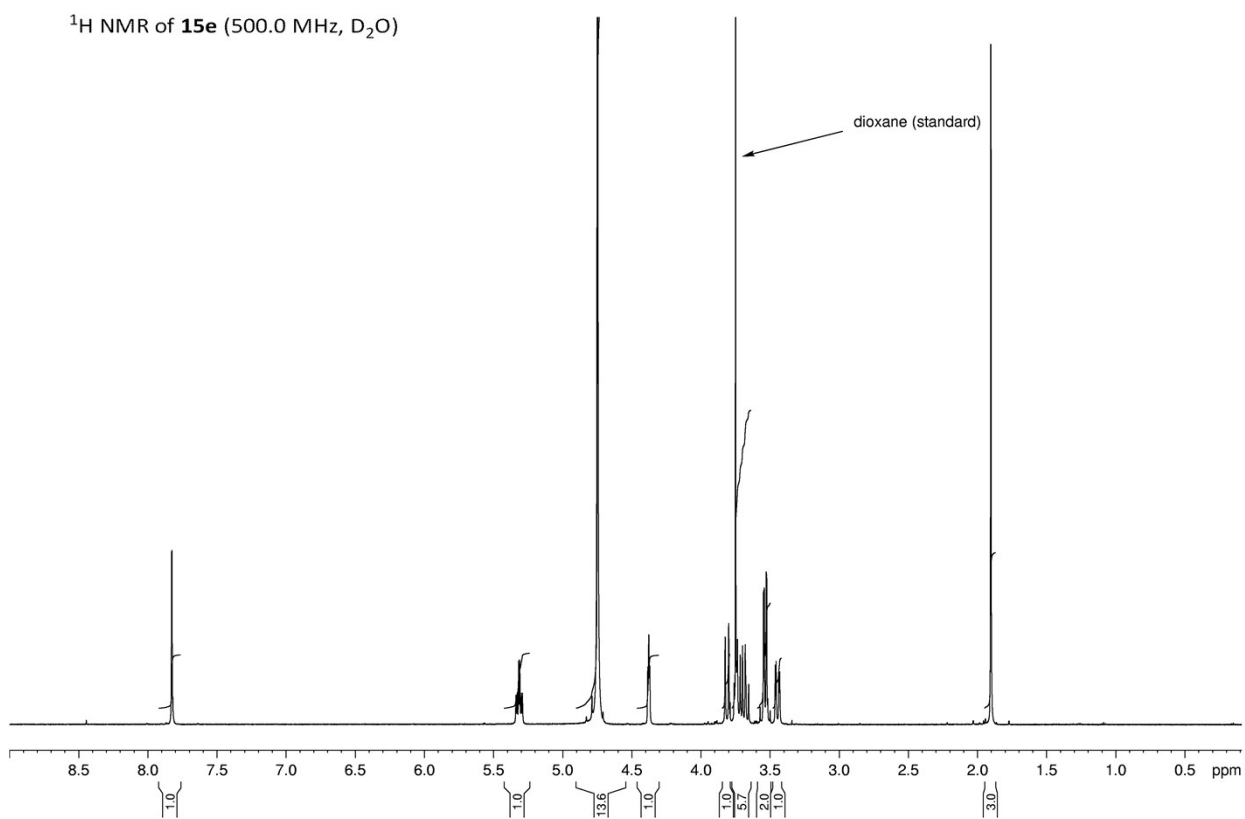

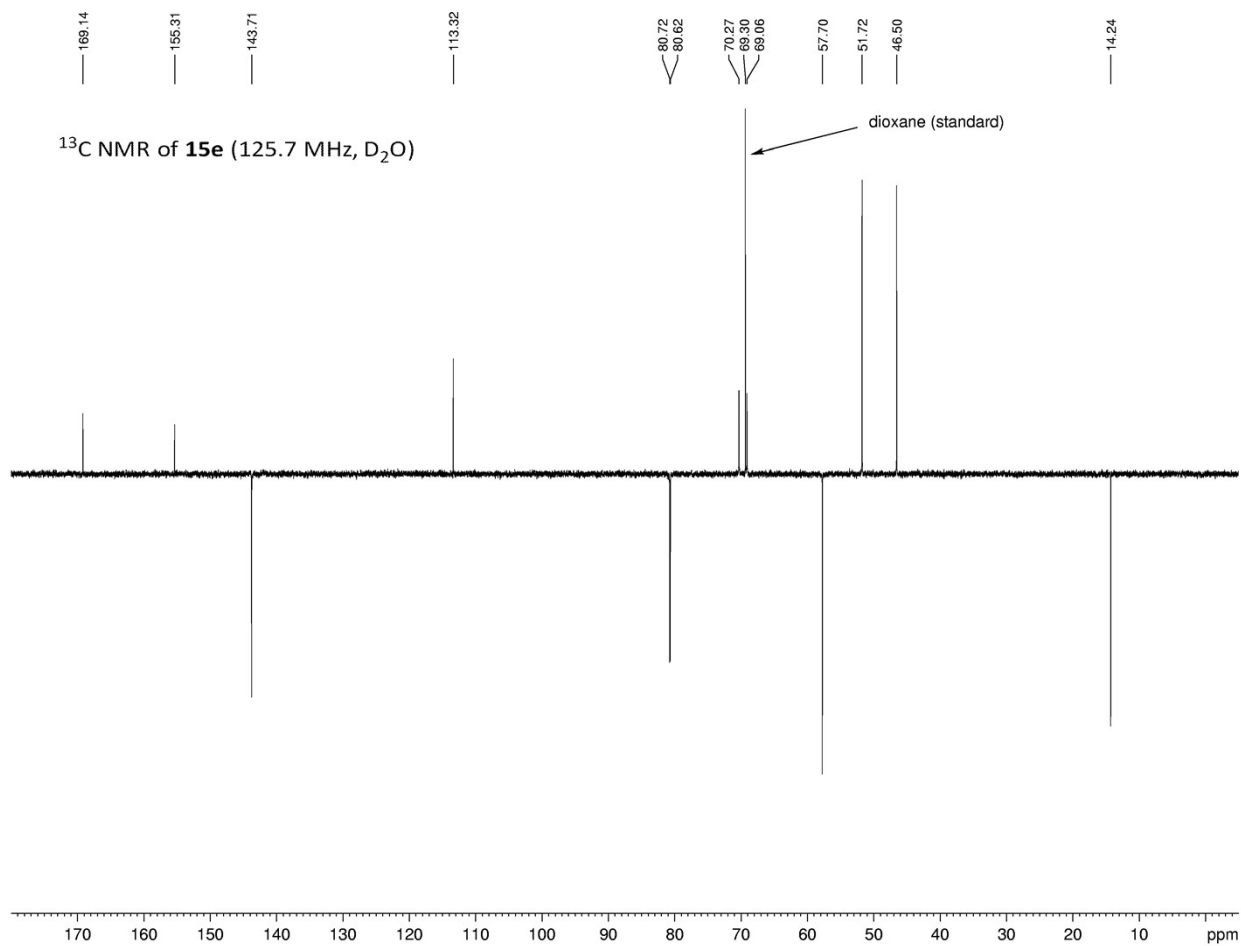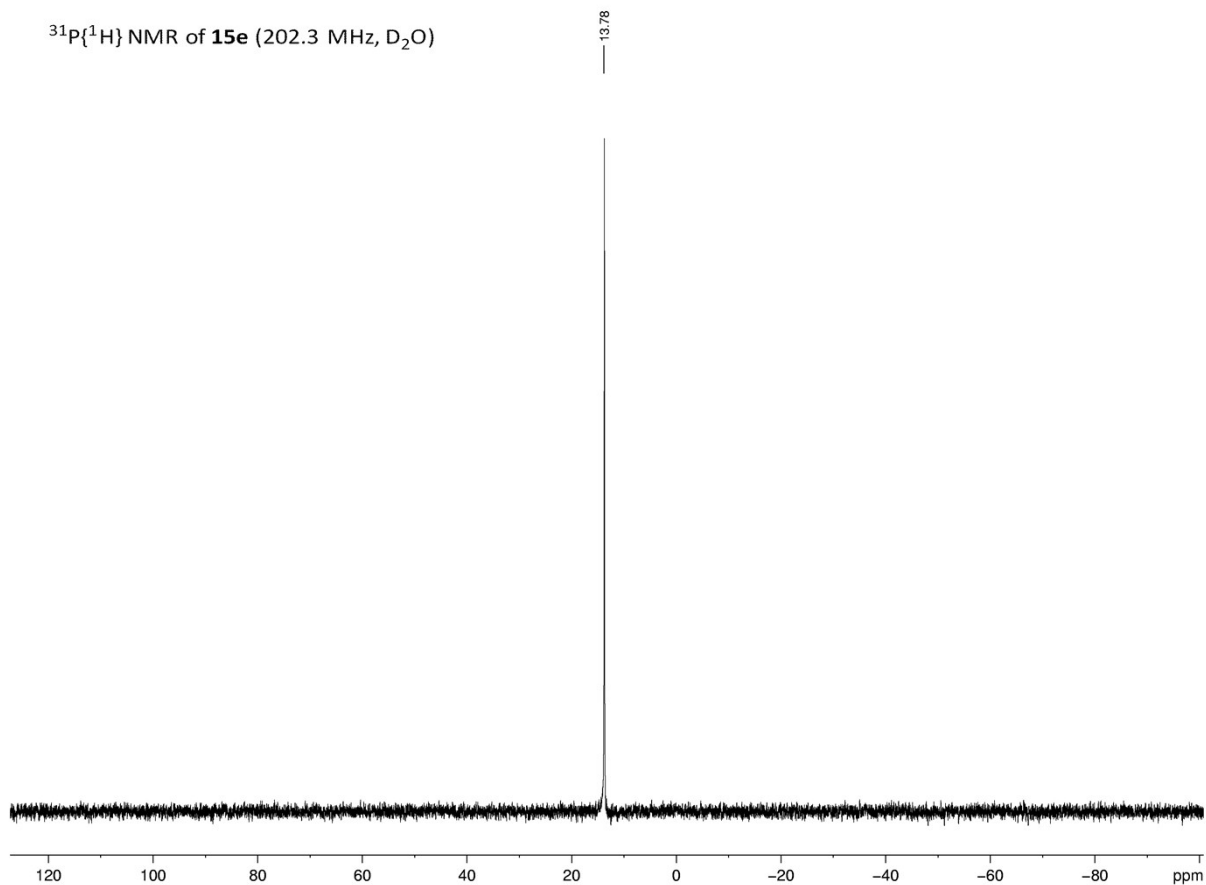

$^1\text{H}$  NMR of **16a** (500.0 MHz,  $\text{D}_2\text{O}$ )

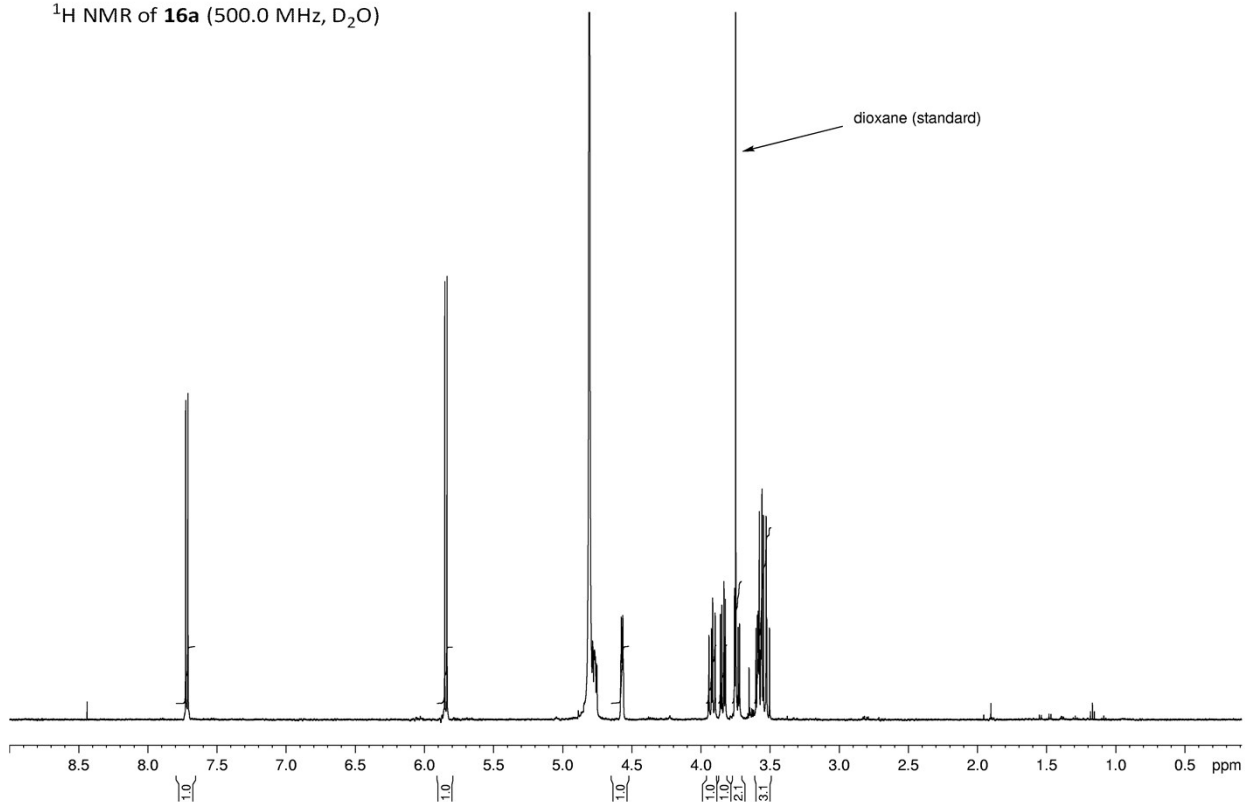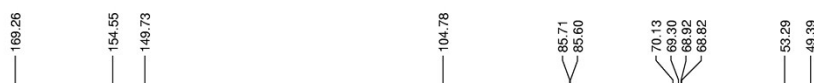

$^{13}\text{C}$  NMR of **16a** (125.7 MHz,  $\text{D}_2\text{O}$ )

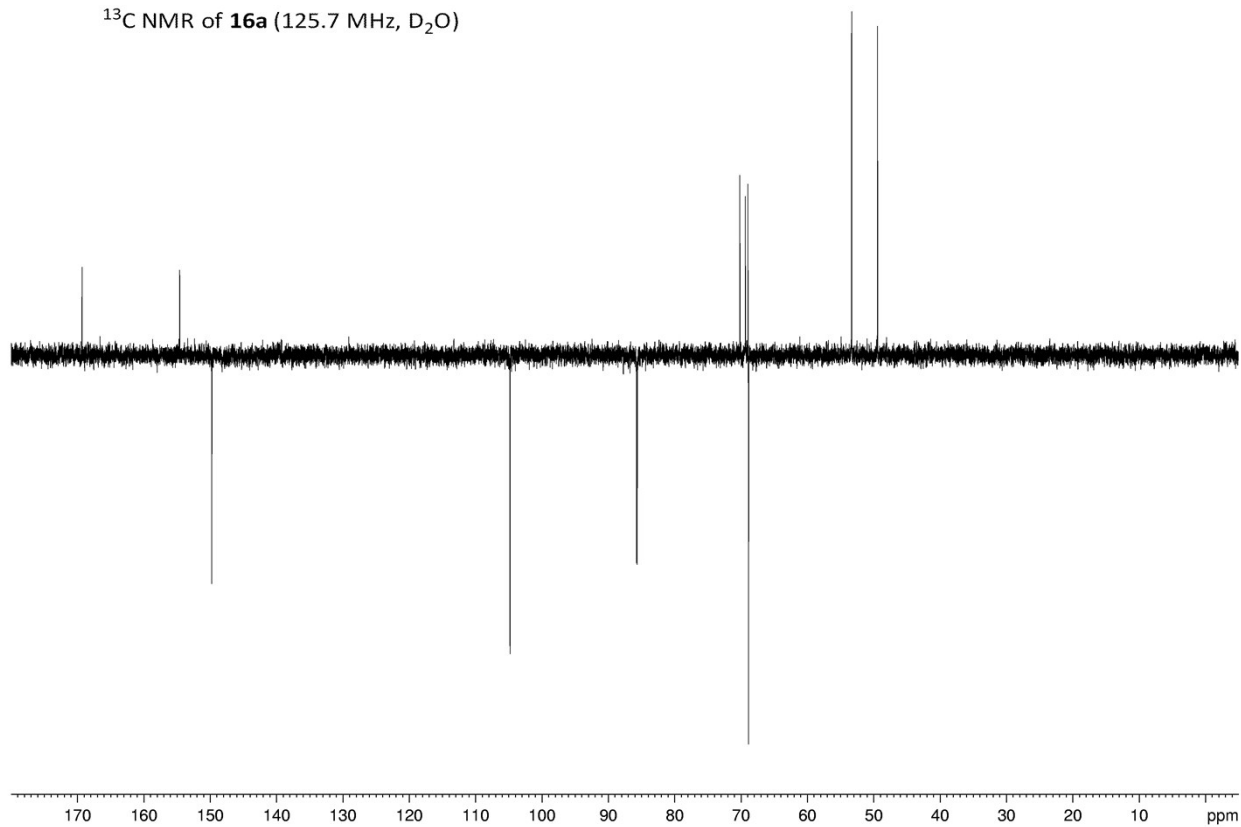

$^{31}\text{P}\{^1\text{H}\}$  NMR of **16a** (202.3 MHz,  $\text{D}_2\text{O}$ )

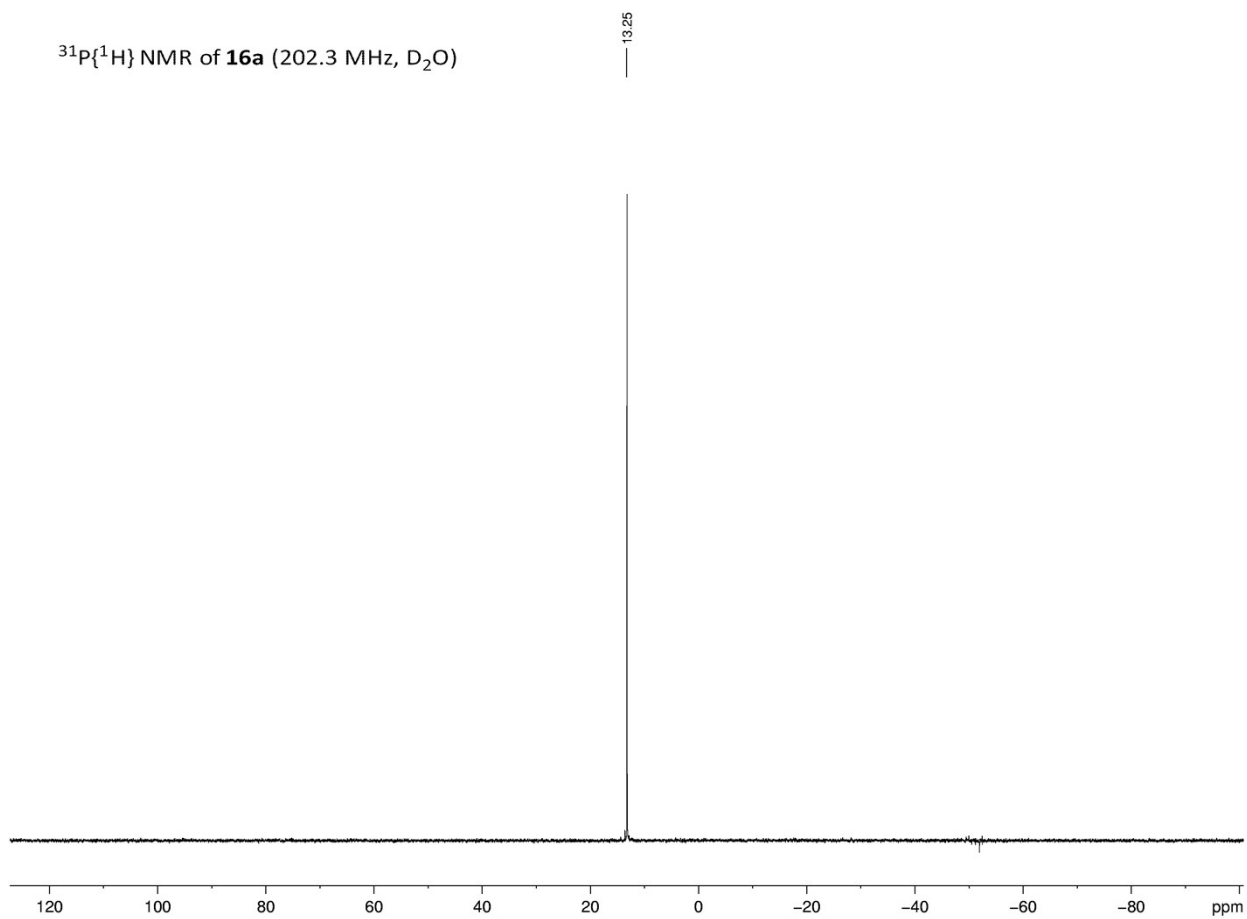

$^1\text{H}$  NMR of **16b** (600.1 MHz,  $\text{D}_2\text{O}$ )

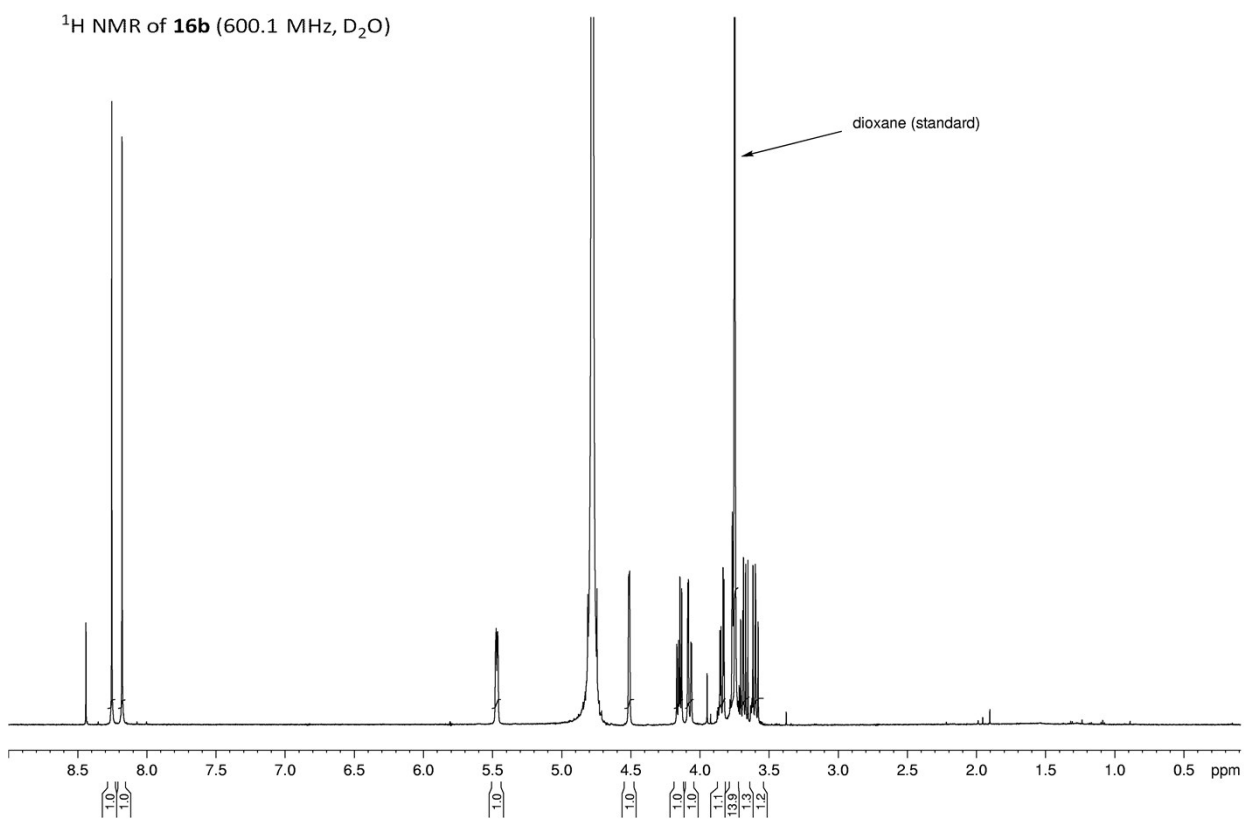

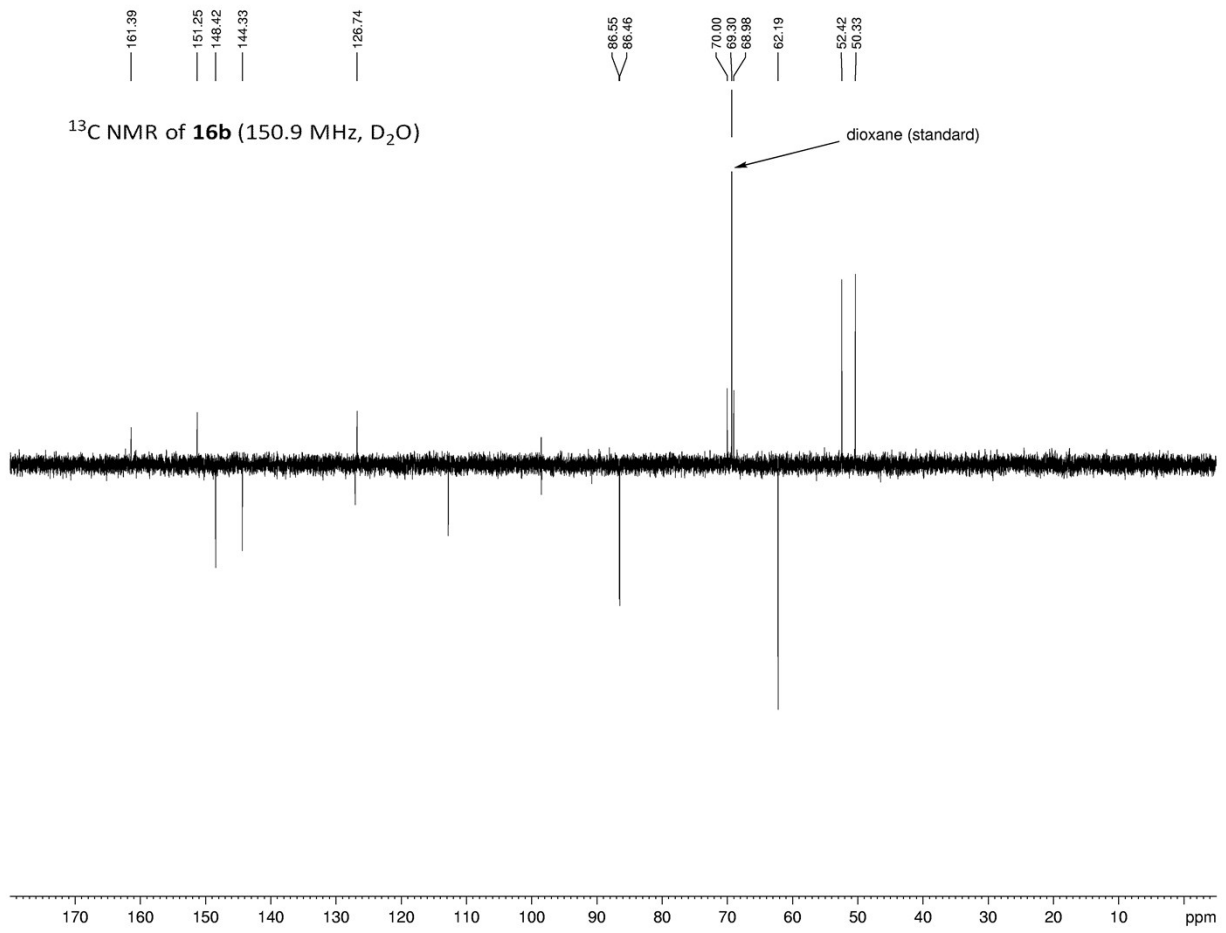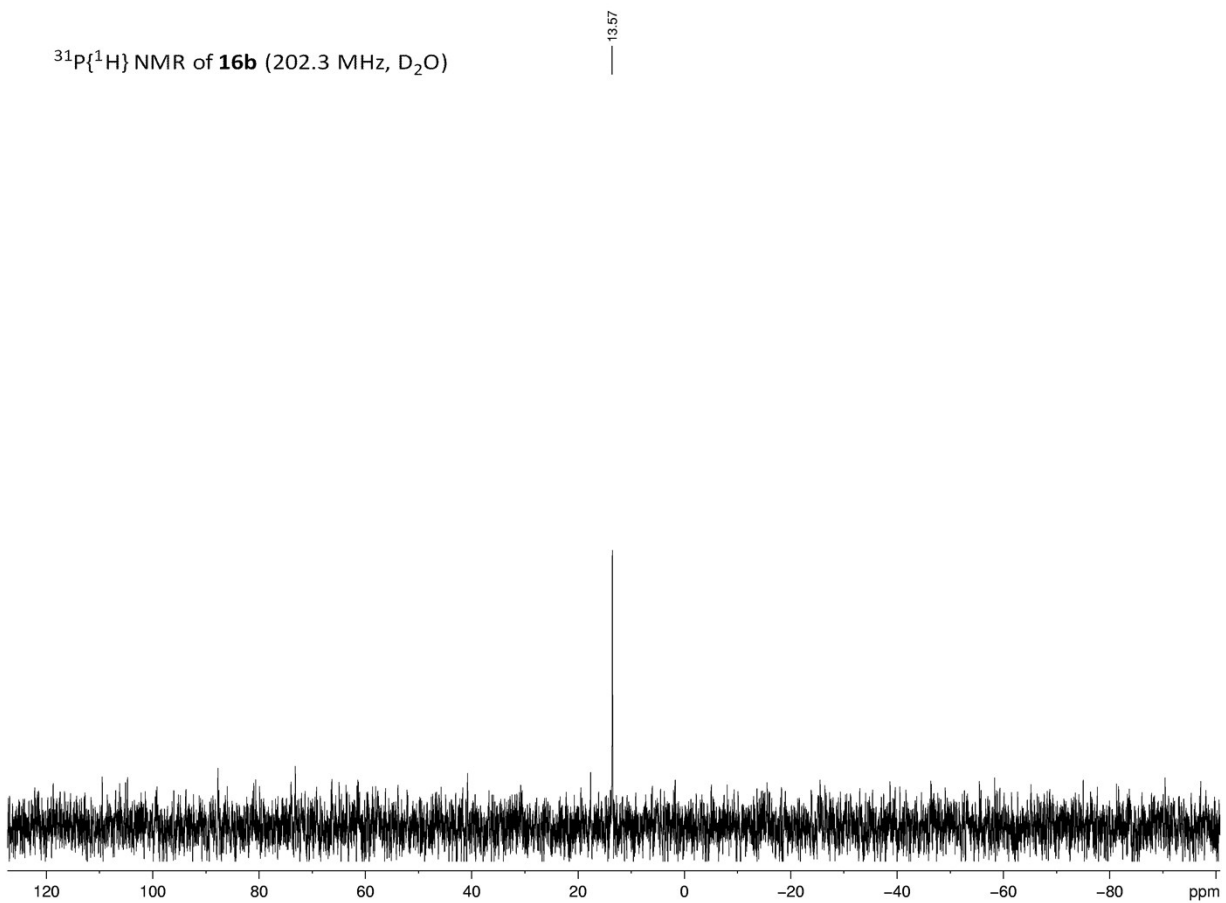



$^1\text{H}$  NMR of **16c** (500.0 MHz,  $\text{D}_2\text{O}$ )

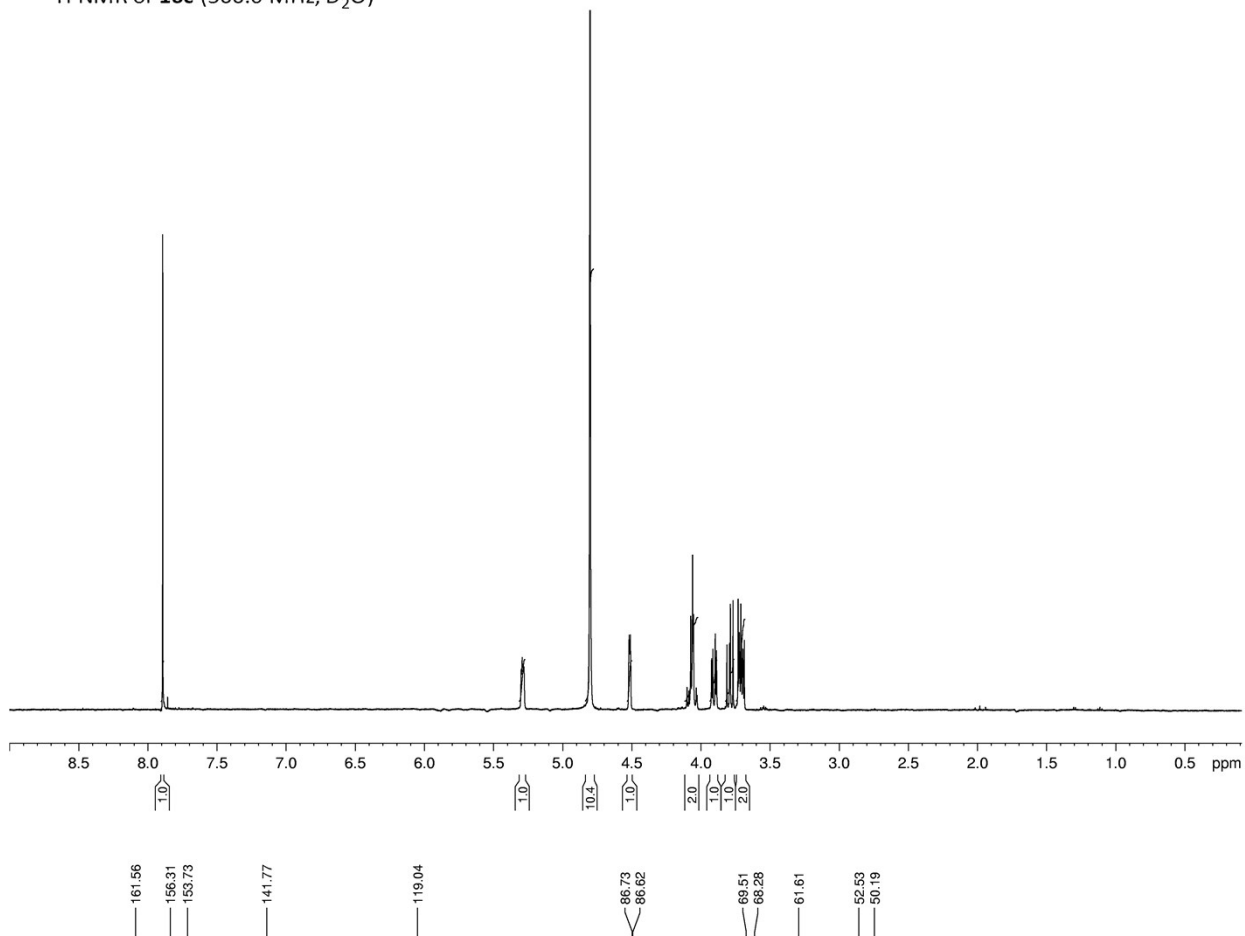

$^{13}\text{C}$  NMR of **16c** (125.7 MHz,  $\text{D}_2\text{O}$ )

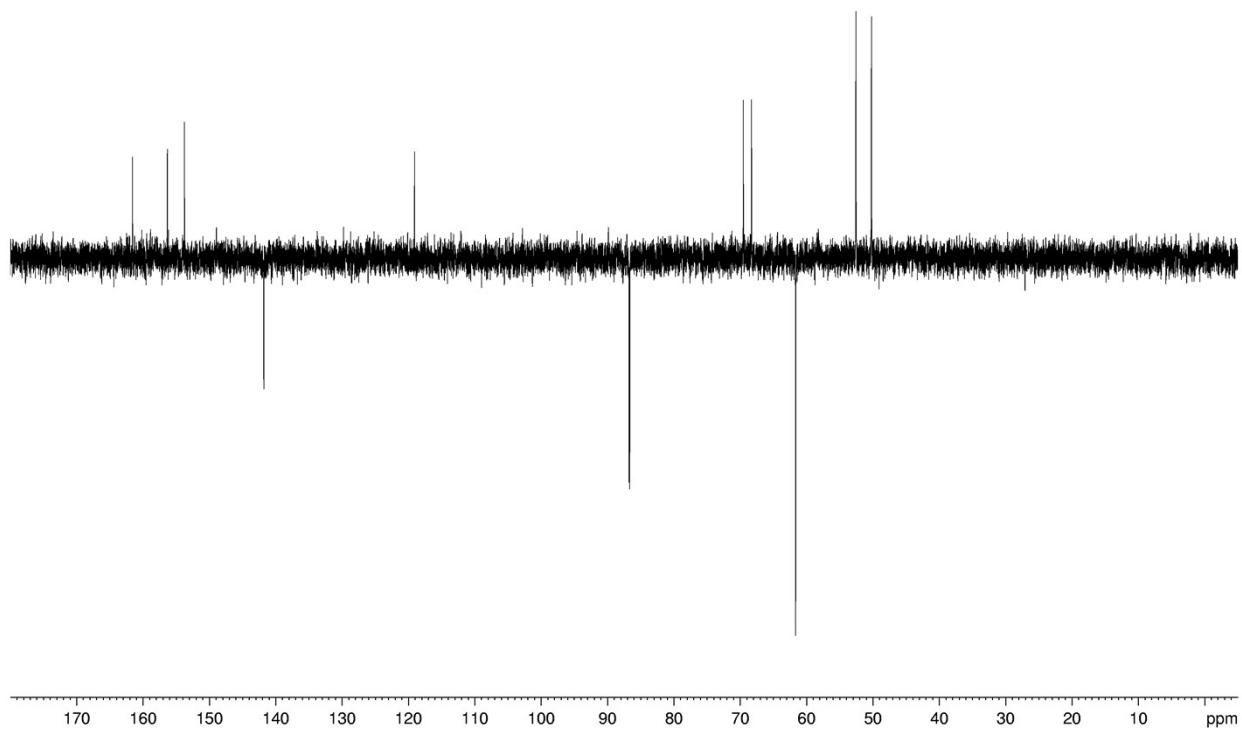

$^{31}\text{P}\{^1\text{H}\}$  NMR of **16c** (202.3 MHz,  $\text{D}_2\text{O}$ )

— 14.71

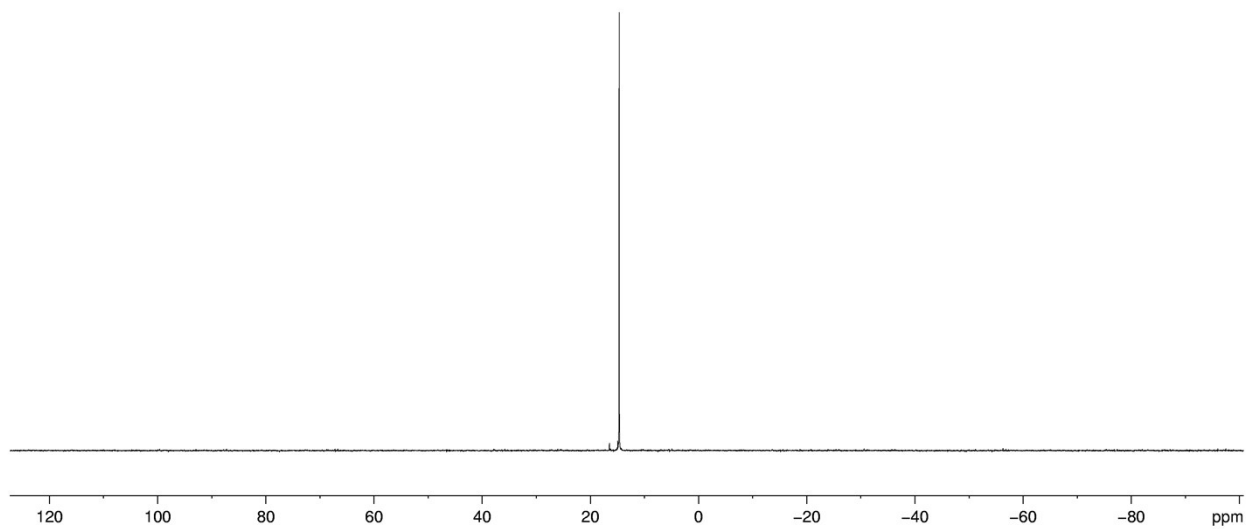

$^1\text{H}$  NMR of **19** (499.8 MHz,  $\text{DMSO-}d_6$ )

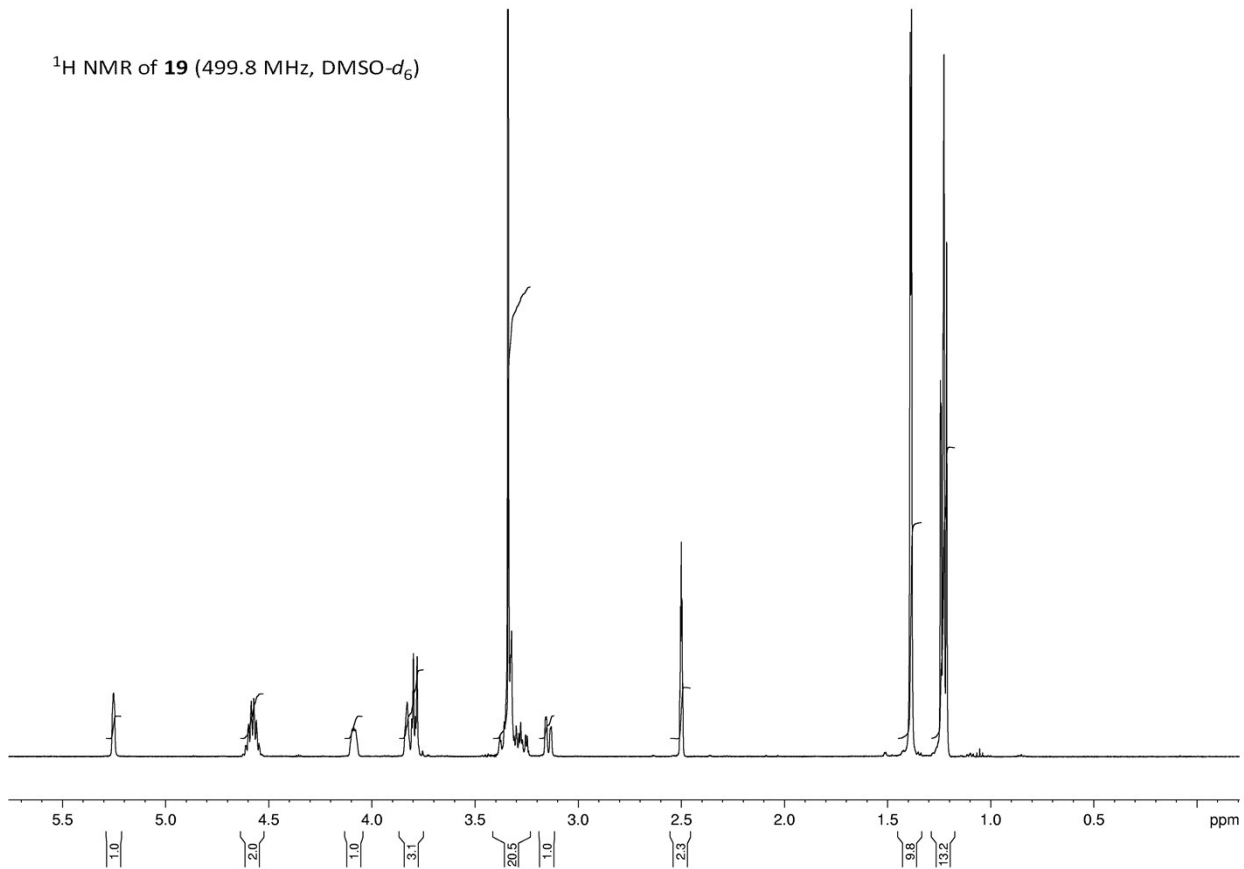

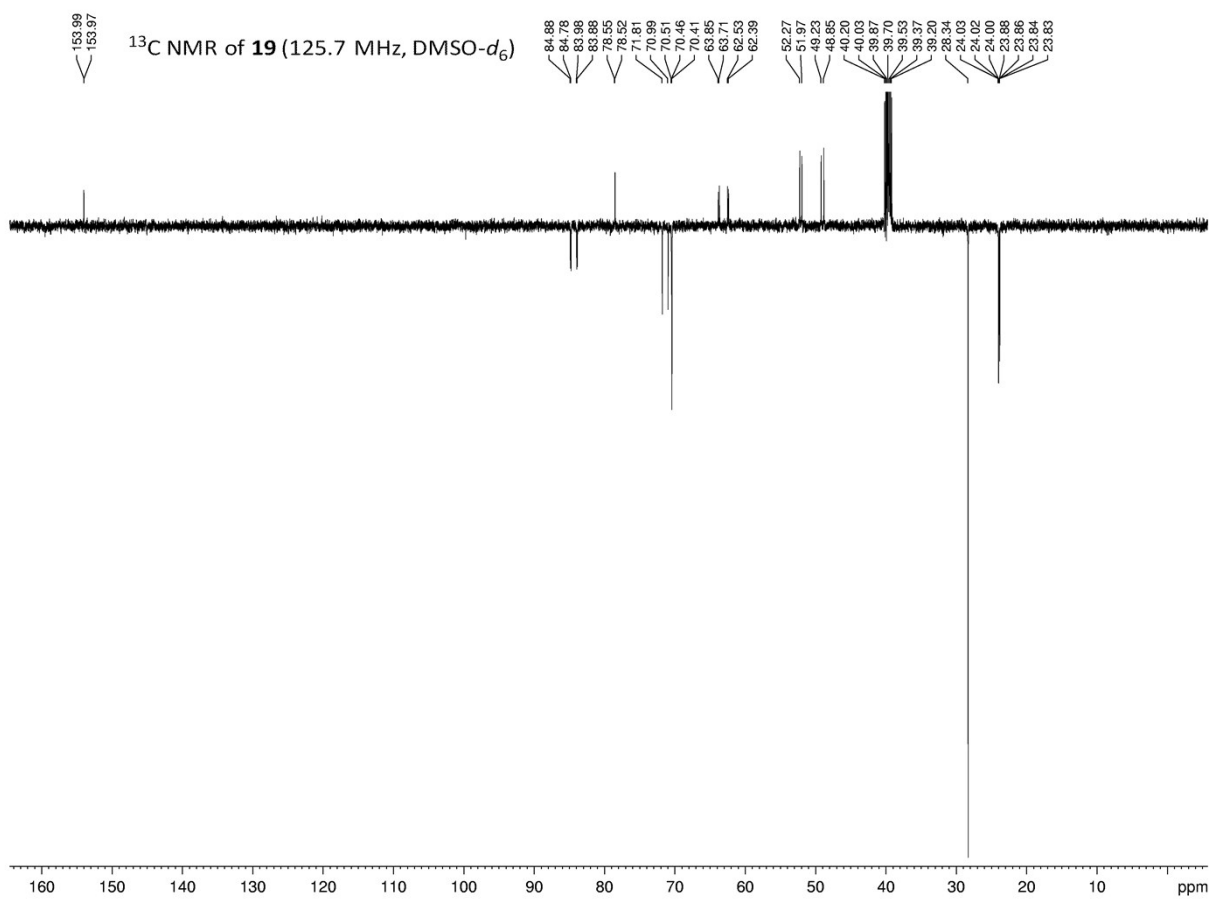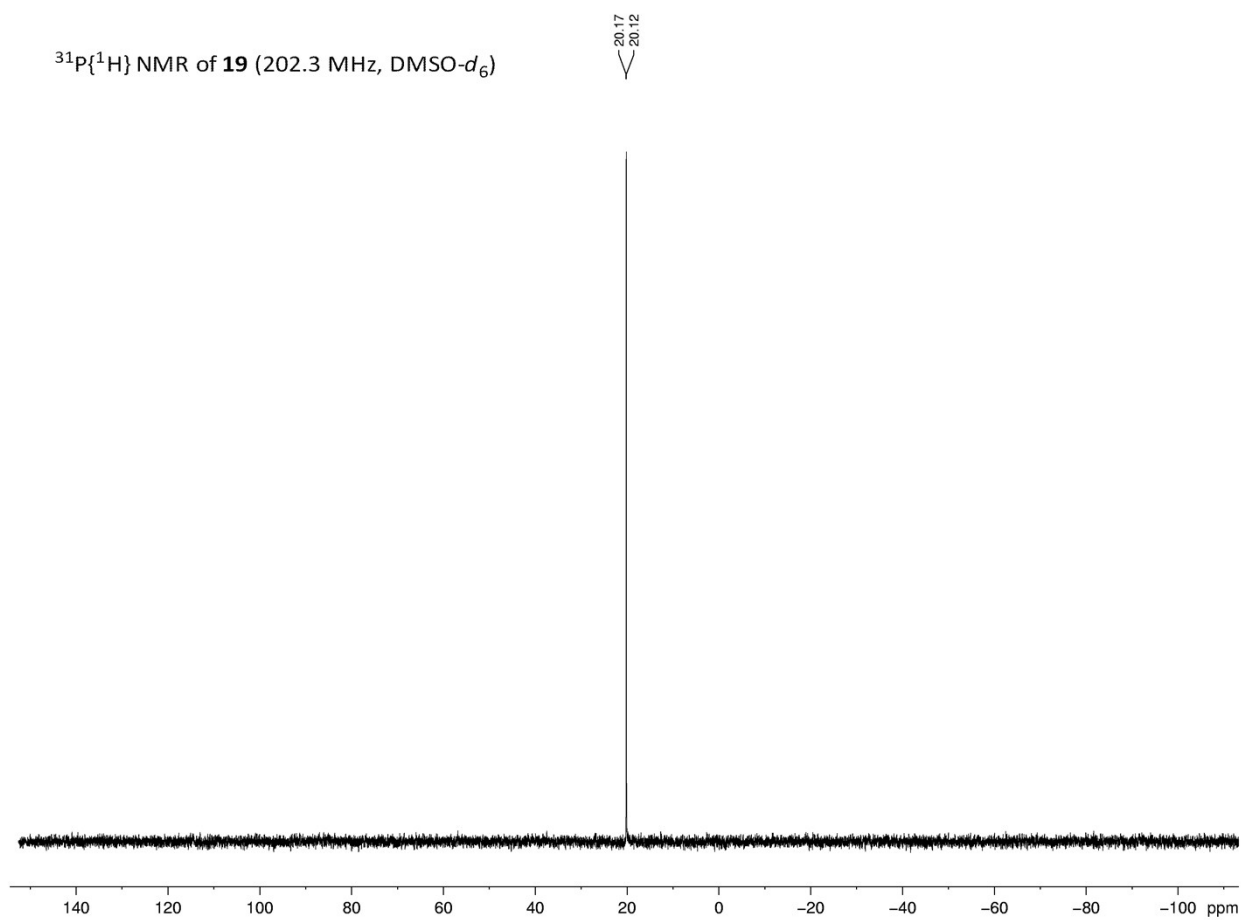

$^1\text{H}$  NMR of **23** (500.0 MHz,  $\text{DMSO-}d_6$ )

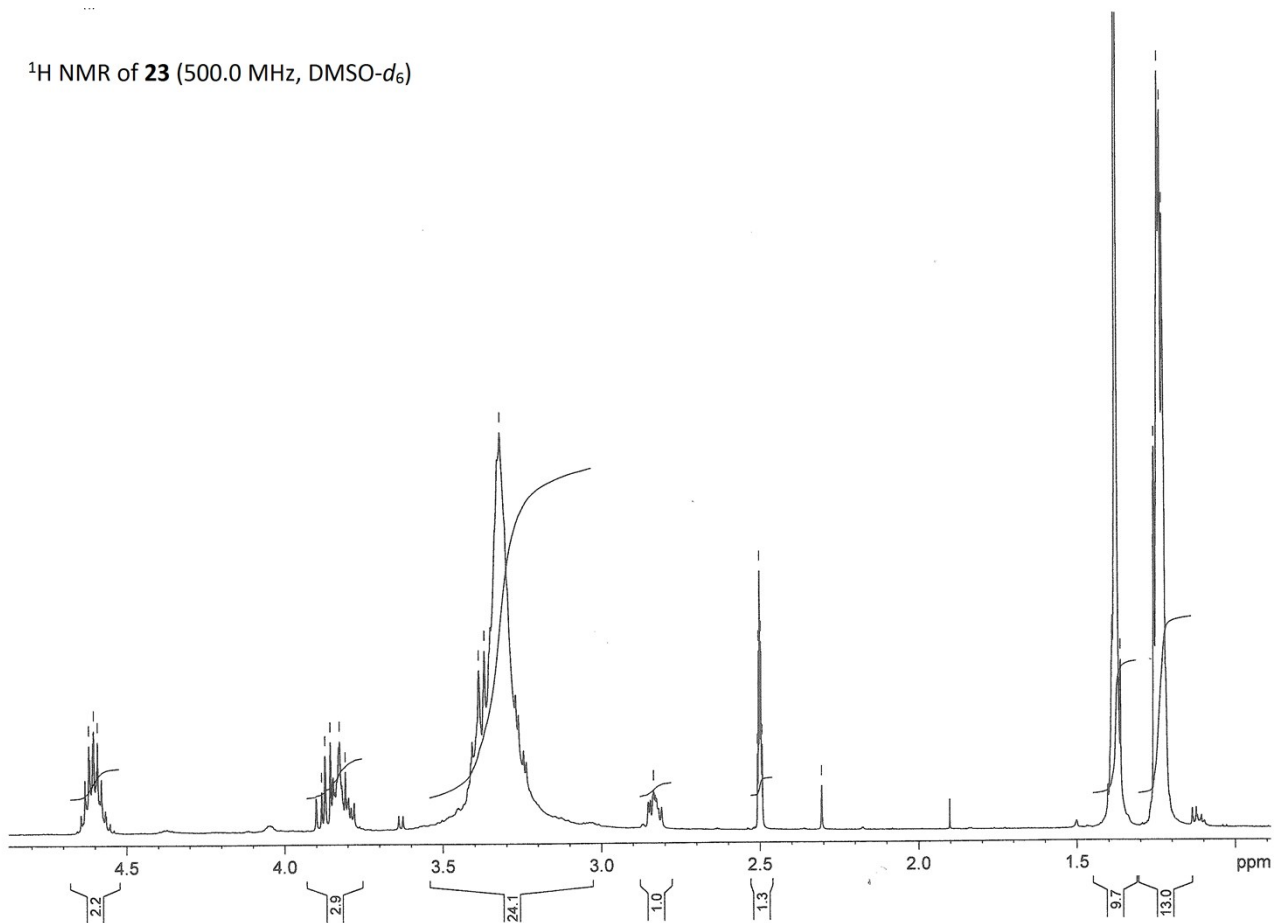

$^{13}\text{C}$  NMR of **23** (125.7 MHz,  $\text{DMSO-}d_6$ )

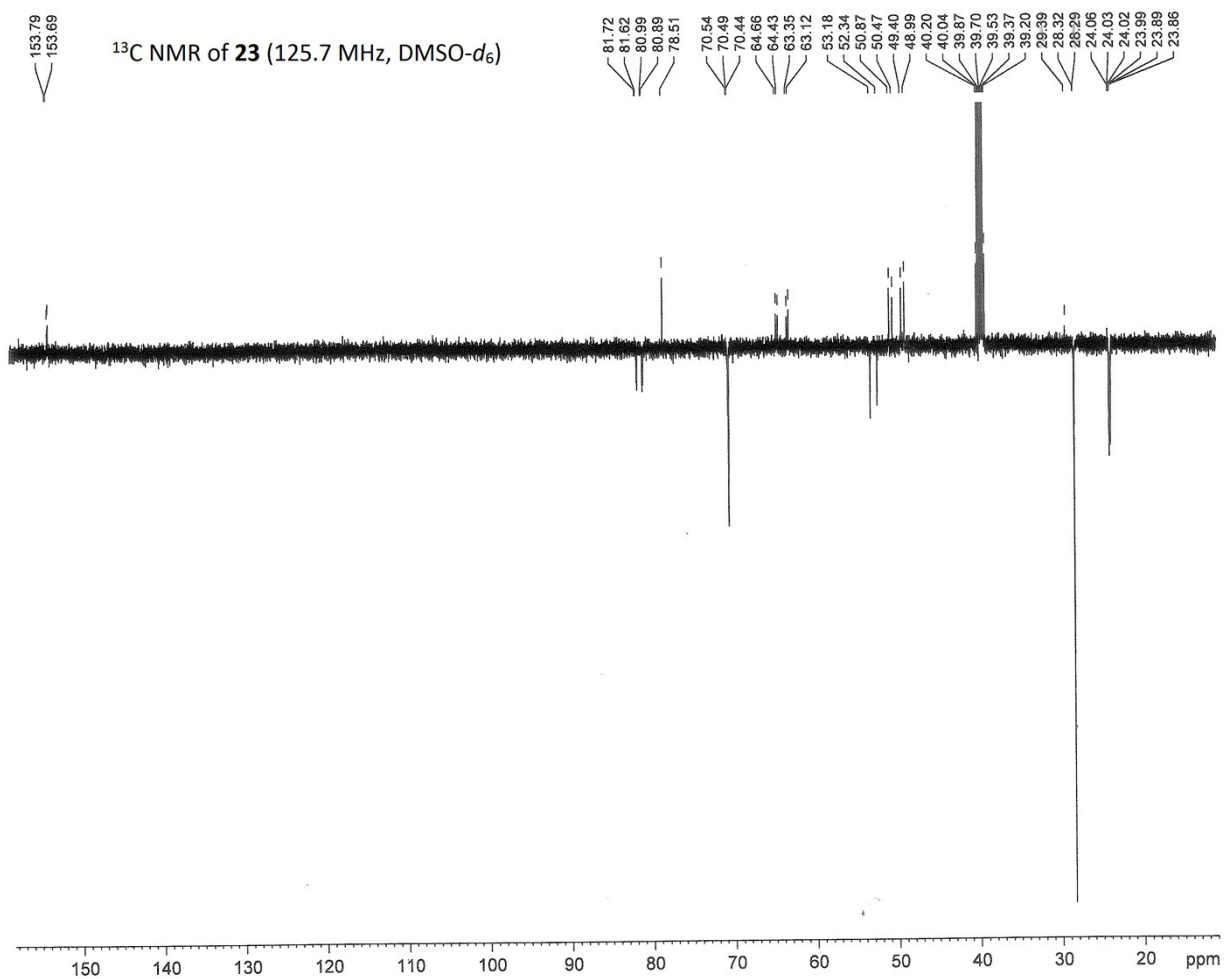

$^{31}\text{P}\{^1\text{H}\}$  NMR of **23** (202.3 MHz,  $\text{DMSO-}d_6$ )

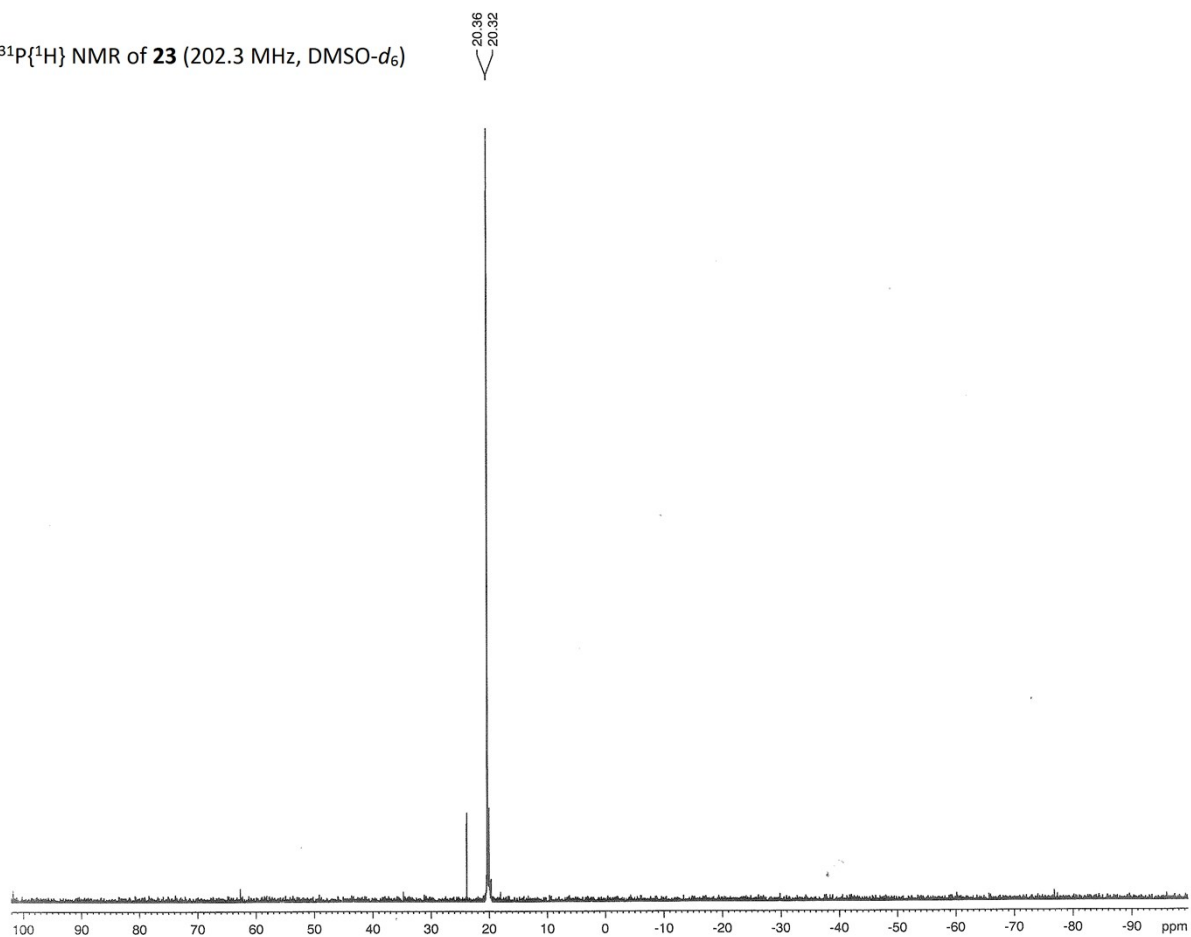

Supplement: c5ob00097a1.pdf [file c5ob00097a1.pdf]
